## Recurrent evolution of two competing haplotypes in an insect DNA virus

Tom Hill<sup>1\*</sup>, Robert L. Unckless<sup>1</sup>

1. 4055 Haworth Hall, The Department of Molecular Biosciences, University of Kansas, 1200 Sunnyside Avenue, Lawrence, KS 66045.

\* Corresponding author - Email: [tom.hill@ku.edu](mailto:tom.hill@ku.edu)

Keywords: nudivirus, *Drosophila innubila*, DiNV, virulence, coevolution

## 1 **Abstract**

2 Hosts and viruses are constantly evolving in response to each other: as hosts attempt to suppress the virus,  
3 the virus attempts to evade and suppress the host's immune system. This arms race results in the evolution  
4 of novel pathways in both the host and virus to gain the upper hand. Here we describe the coevolution  
5 between *Drosophila* species and a common and virulent DNA virus. We identify two distinct viral types  
6 that differ 100-fold in viral titer in infected individuals, with similar effects across multiple species. Our  
7 analysis suggests that one of the viral types appears to have recurrently evolved at least 4 times in the past  
8 ~30,000 years, including in another geographically distinct species, due to the high effective mutation rate  
9 which increases with titer. The higher titer viral type is associated with suppression of the host immune  
10 system and an increased transmission rate compared to the low viral titer type. Both types are maintained  
11 in all populations, likely due to an increased virulence in the high titer type creating a trade-off between  
12 effective transmission and virulence and resulting in nearly equal reproduction rates ( $R_0$ ) in both types.  
13 Together these results suggest that the reciprocal selective pressures caused by the co-evolution between  
14 host and virus has resulted in this recurrently evolving relationship.

## 15 **Introduction**

16 Antagonistic coevolution between hosts and their parasites is nearly ubiquitous across the tree of life. As a  
17 result, genes involved in immune defense are among the fastest evolving genes in host genomes (NIELSEN  
18 *et al.* 2005; SACKTON *et al.* 2007; ENARD *et al.* 2016; SHULTZ AND SACKTON 2019). Viruses are a particular  
19 fitness burden on hosts; for viruses to persist within populations, they must successfully invade the host  
20 organism, contend with the host immune system, replicate and then transmit the newly produced particles  
21 to a new host (HOLMES 2007; GIFFORD 2012). Once successfully established in a population, natural  
22 selection acts to modulate the rate the virus propagates relative to its virulence, optimizing the ratio of viral  
23 virulence to transmission (WILLIAMS AND NESSE 1991; MAY AND NOWAK 1995; LIPSITCH *et al.* 1996).  
24 Thanks to their elevated mutation rate and high population sizes, viruses can easily do all of this, and even  
25 co-opt or manipulate host-pathways in the process (BURGYAN AND HAVELDA 2011; DAVEY *et al.* 2011;  
26 PALMER *et al.* 2019). As a result, proteins that interact with viruses often show the fastest rates of evolution,  
27 and the highest rates of adaptation compared to the rest of the genome, as the host attempts to suppress the  
28 pathogen, or escape infection (OBBARD *et al.* 2006; OBBARD *et al.* 2009a; MUKHERJEE *et al.* 2013; ENARD  
29 *et al.* 2016; PALMER *et al.* 2018a).

30 Hosts have evolved numerous immune pathways to reduce viral burden and enhance survival after  
31 infection (MERKLING AND VAN RIJ 2013; WEST AND SILVERMAN 2018). Interestingly, several of these  
32 pathways (IMD, Toll, JAK-STAT) are generally associated with other pathogens, yet also respond to  
33 infection by viruses, though the specific mechanisms are not yet known (HOFFMANN 2003; HULTMARK

34 2003; COCCIA *et al.* 2004; ZAMBON *et al.* 2005; COSTA *et al.* 2009; FERREIRA *et al.* 2014; WEST AND  
35 SILVERMAN 2018). In *Drosophila melanogaster*, the RNA interference (RNAi) pathway is involved in  
36 resisting viral infection by generating suppressive RNAs complementary to the viral sequence (HULTMARK  
37 2003). As might be expected, this antiviral RNAi pathway is also rapidly evolving in many species  
38 (OBBARD *et al.* 2006; WANG *et al.* 2006; OBBARD *et al.* 2009b; MERKLING AND VAN RIJ 2013).

39 *Drosophila innubila* Nudivirus (DiNV), which infects the host *D. innubila*, is the one of the few  
40 DNA viruses to naturally infect *Drosophila*, and the only documented case of a DNA virus infection at high  
41 frequency in natural *Drosophila* populations (UNCKLESS 2011; HILL *et al.* 2019). *Drosophila innubila* is a  
42 mushroom feeding species of the *Drosophila* subgenus found inhabiting woodlands found on mountains  
43 across Arizona & New Mexico, separated by large expanses of desert. *D. innubila* radiated north from  
44 Mexico during the last glaciation period and came to inhabit these forests after the glacial retreat, creating  
45 a subdivided population with high rates of gene flow between locations (DYER AND JAENIKE 2005; HILL  
46 AND UNCKLESS 2020).

47 During this period *D. innubila* likely became infected with DiNV, suggesting a long-lasting host-  
48 pathogen relationship in multiple populations. This could lead to opportunities to study the coevolution of  
49 DiNV and *D. innubila* in replicate (HILL AND UNCKLESS 2020), which could potentially result in parallel  
50 or divergent evolution of the virus and interacting host pathways (ANDERSON AND MAY 1982; KALTZ AND  
51 SHYKOFF 1998).

52 A pair of previous studies examined the rates of evolution of DiNV and *D. innubila*, finding the  
53 envelope and replication machinery to be rapidly evolving in DiNV, suggesting its importance in viral  
54 propagation (HILL AND UNCKLESS 2018). In *D. innubila*, the antiviral RNAi machinery is not rapidly  
55 evolving, possibly as DNA viruses interact with different immune pathways to RNA viruses (the primary  
56 burden of *D. melanogaster*) (WEBSTER *et al.* 2015). Consistent with this, the Toll pathway is both rapidly  
57 evolving in *D. innubila* and suppressed by a related nudivirus upon infection in *D. melanogaster* (HILL *et*  
58 *al.* 2019; PALMER *et al.* 2019).

59 DNA viruses, and nudiviruses such as DiNV in particular, have much larger genomes (100kbp or  
60 larger) than RNA viruses, with much more complicated replication cycles (ROHRMANN 2013). RNA viruses  
61 also have much higher mutation rates than DNA viruses, yet much lower levels of diversity due to lower  
62 recombination rates and efficient selection on variation in the genome (PENNINGS 2012; PENNINGS *et al.*  
63 2014; WILSON *et al.* 2016; FEDER *et al.* 2019). As a result, we expect the evolutionary dynamics of DNA  
64 viruses to differ dramatically from RNA viruses (ROHRMANN 2013; HILL AND UNCKLESS 2017). In fact,  
65 because of their large genomes, high recombination rate and low mutation rate, we expect that DNA virus  
66 coevolution with hosts will be qualitatively different than RNA viruses or bacteria. Together this paints a  
67 picture suggesting that hosts can have different relationships with different pathogens (such as RNA viruses

68 or DNA viruses), and the pathogens themselves can behave differently within the host. Characterizing the  
69 relationships between different species and their long-term pathogens, such as DiNV and *D. innubila*, will  
70 help broaden and expand our understanding of how hosts and pathogens evolve in response to each other.

71 Here, we survey the genetic variation in DiNV to infer its co-evolutionary history with *D. innubila*  
72 and two other associated hosts. We identify two viral multilocus genotypes (considered to be haplotypes)  
73 that differ by 11 focal SNPs and show that these viral types are maintained within the same host population  
74 and across multiple isolated host populations. Despite high rates of recombination, these SNPs are tightly  
75 linked likely due to extremely strong selection and possibly incompatibilities between types. One viral type  
76 is associated with 100-fold higher viral titer and increased virulence compared to the other. Further, we find  
77 evidence that the high titer type evolved independently in at least four geographically-isolated host  
78 populations. Together, these results suggest rapid evolutionary dynamics of host-virus interactions, due to  
79 the multiple competing viral types that interact with different host pathways.

## 80 **Results**

### 81 *DiNV segregates for linked variants strongly associated with viral titer*

82 To characterize the evolutionary dynamics of wild *Drosophila innubila* Nudivirus (DiNV) in its host (*D.*  
83 *innubila*), we sequenced wild-caught individuals from four populations with the expectation that some  
84 (~40% in previous samples) individuals would be infected (HILL AND UNCKLESS 2020). We considered  
85 strains to be infected with DiNV if they had at least 10x coverage for 95% of the genome. In total, we used  
86 sequencing information for 57, 92, 92, and 92 individuals from the Huachucas (HU), Santa Ritas (SR),  
87 Chiricahuas (CH), and Prescott (PR) populations with infection rates 26%, 44%, 63% and 79%, respectively  
88 (Supplementary Table 1). We also used 35 individuals collected in the Chiricahuas in 2001 (52% infected  
89 with DiNV) and 80 individuals collected in the Chiricahua's in 2018 (Supplementary Table 2, pre-selected  
90 using PCR, 40 infected with DiNV and 40 uninfected).

91 We isolated and sequenced DNA from these samples and, after filtering and mapping to the genome  
92 we called variation in the viral genomes to assess the extent of adaptation in each viral population.  
93 Consistent with an arms race between host and virus, most envelope and novel virulence (GrBNV-like)  
94 genes show strong signatures of adaptive evolution in each population compared to background viral genes  
95 (using McDonald-Kreitman based statistic Direction of Selection (STOLETZKI AND EYRE-WALKER 2011)  
96 and Selection Effect (EILERTSON *et al.* 2012), Supplementary Figure 1, DoS > 0, GLM *p*-value < 0.05).

97 Given these potential signatures of an arms race between *D. innubila* and DiNV, we first attempted  
98 to determine if any host or viral genetic variation is associated with within-host viral titer, which we use  
99 here as a measure of virulence. For each virus-infected individual, we quantified viral titer (as viral genome  
100 coverage normalized to host autosomal genome coverage) and identified both host and viral

101 polymorphisms. We then performed an association study across both host and virus variable sites to identify  
102 variants significantly associated with viral titer using PLINK (PURCELL *et al.* 2007).

103 Of 5,283 viral SNPs in the 155kbp DiNV genome, 1,403 SNPs are segregating in at least 5 infected  
104 host individuals. Of those 1,403 SNPs, 78 are significantly associated with viral titer after multiple testing  
105 correction (FDR < 0.01, Figure 1A). Of these, 16 are within 2000bp of the start site of a gene, 18 are coding  
106 nonsynonymous, 11 are coding synonymous and 33 are intergenic. The most significantly associated SNP  
107 is a non-synonymous polymorphism in the active site of *Helicase-2* (Figure 1A, Supplementary Figure 2).  
108 The *Helicase-2* polymorphism is the only significantly associated polymorphism found segregating at a  
109 range of frequencies *within* individuals (Supplementary Figure 2). The frequency of this derived  
110 polymorphism has a negative relationship between viral titer and the derived SNPs frequency (GLM t-value  
111 = -20.516, *p*-value = 5.55e-62). However, when ranking samples by viral titer, the SNP frequency does not  
112 fit this expectation and several samples fixed for the ancestral allele also have a lower viral titer  
113 (Supplementary Figure 2).

114 We also identified a striking association between viral titer and eleven nearly perfectly linked  
115 polymorphisms found across the DiNV genome (Figure 1A, highlighted SNPs, Table 1, Supplementary  
116 Figures 2-4, Sig. SNPs). We refer to these two types as the ‘High Type’ and ‘Low Type’ (Figure 1B).  
117 This multilocus genotype includes three non-synonymous SNPs and five SNPs in the UTRs of known  
118 virulence factor genes and three intergenic SNPs. Viral titer is, on average, 100-fold higher in individuals  
119 infected with High type virus compared to the ancestral Low type (Figure 1B). Though we found few  
120 strains with an intermediate number of SNPs, viral titer increases as the number of High type SNPs  
121 increases (Figure 1C, GLM t-value = 34.971, *p*-value = 5.912e-16), though the rate of increase slows as  
122 the number of High type SNPs increases suggesting diminishing returns (Figure 1C). Some of these  
123 polymorphisms are associated with known virulence factors, or are related to the formation of the viral  
124 envelope co-opting the host vesicle trafficking system and are rapidly evolving in nudiviruses (e.g. *VLF-*  
125 *1*, *ODV-E56*, *PIF-3*) (ROHRMANN 2013; HILL AND UNCKLESS 2017; HILL AND UNCKLESS 2018).  
126 Additionally, several are associated with orphan genes thought to be novel virulence factors, including a  
127 *gp83*, a gene that downregulates Toll-induced antimicrobial peptides (AMPs) and upregulates those  
128 induced by IMD (*gp83*) (PALMER *et al.* 2019). Both pathways may interact with DNA viruses (ZAMBON  
129 *et al.* 2005; COSTA *et al.* 2009; MERKLING AND VAN RIJ 2013; FERREIRA *et al.* 2014; LAMIABLE *et al.*  
130 2016; PALMER *et al.* 2019).

131 Among populations there is a positive correlation between the frequency of the High type and  
132 overall DiNV infection frequency (Figure 1D, GLM logistic regression z-value = 6.104, *p*-value =  
133 0.00883), suggesting that the High type may have a higher effective transmission rate, resulting in a  
134 higher number of new individuals infected, per DiNV infected individual. The transmission rate appears

135 to be higher for the High type, despite a possibly higher death rate than the Low type. We also find both  
 136 viral types in collections from 2001 and 2017, with the High type significantly more common in the 2017  
 137 collection (Fisher Exact Test  $p$ -value = 0.0167, Figure 1D).

138 **Table 1:** Candidate viral SNPs associated with viral titer, their loci, associated genes and the functional  
 139 category of that gene.

| SNP loci | Nearest gene      | SNP functional annotation | Nearest gene functional annotation                                       |
|----------|-------------------|---------------------------|--------------------------------------------------------------------------|
| G14249T  | <i>VLF-1</i>      | Non-Synonymous            | Required for late stage virus activity and particle assembly             |
| C41210T  | <i>LEF-4</i>      | Non-Synonymous            | RNA polymerase subunit for RNA modification                              |
| G42389T  | <i>gp83</i>       | Upstream                  | Suspected virulence factor which suppresses Toll activity                |
| A59194G  | <i>gp51</i>       | Intergenic                | Suspected virulence factor                                               |
| C59275A  | <i>PIF-6</i>      | Upstream                  | Per OS Infectivity factor envelope protein, required for oral infection  |
| T59276C  | <i>PIF-6</i>      | Upstream                  | Per OS Infectivity factor envelope protein, required for oral infection  |
| G66615A  | <i>gp19</i>       | Non-Synonymous            | Suspected virulence factor                                               |
| C78978T  | <i>gp94</i>       | Intergenic                | Suspected virulence factor                                               |
| G78991A  | <i>gp94</i>       | Intergenic                | Suspected virulence factor                                               |
| C126118A | <i>ODV-E56-2</i>  | Upstream                  | Occlusion-derived virus envelope protein required for particle formation |
| A132593C | <i>Helicase-2</i> | Non-Synonymous            | Unwinds DNA and is critical for DNA replication                          |
| T140117C | <i>PIF-3</i>      | Upstream                  | Per OS Infectivity factor envelope protein, required for oral infection  |

140

141 Further, the expression of the virally encoded suppressor of Toll signaling, *gp83*, per viral particle  
 142 is greater in strains containing at least one derived SNP of the high type increase (Figure 1E, GLM t-value  
 143 = 10.32,  $p$ -value = 7.34e-12), suggesting enhanced virulence in the high type. For these SNPs, few are  
 144 found at intermediate frequencies within samples (Supplementary Figure 2), and no samples contain more  
 145 than two SNPs at a similar frequency (Supplementary Figure 2). This suggests that hosts are either  
 146 infected completely with Low type or High type virus particles and the two types may be partially

147 incompatible with each other. Together, these results suggest that the high viral type is more virulent  
148 possibly because it is better able to suppress host Toll signaling.

149 **Figure 1:** Viral genome-wide association study for DiNV titer in wild *D. innubila*. **A.** Manhattan plot for  
150 each DiNV SNP and the significance of its association with DiNV titer. SNPs are colored if they are  
151 upstream, synonymous, non-synonymous or nonsense mutations. 12 named SNPs are either part of the  
152 significantly associated viral haplotype or are in *Helicase-2*. The FDR corrected  $p$ -value cutoff of 0.01 is  
153 shown as a dashed line (multiple testing correction for 1,403 tests). **B.** Viral titer for individual wild  
154 caught flies infected with Low and High DiNV haplotypes (containing all high-type SNPs). The middle  
155 bar represents median value, upper and lower bars represent 25<sup>th</sup> and 75<sup>th</sup> percentile and whiskers  
156 represent a 95% confidence interval. **C.** Association between the number of significant SNPs and the viral  
157 titer of a sample. **D.** Across five populations, the frequency of the High DiNV haplotype is correlated with  
158 the frequency of the virus infection. **E.** Expression (in FPKM per viral particle) of *gp83* increases with the  
159 number of High DiNV haplotype SNPs.

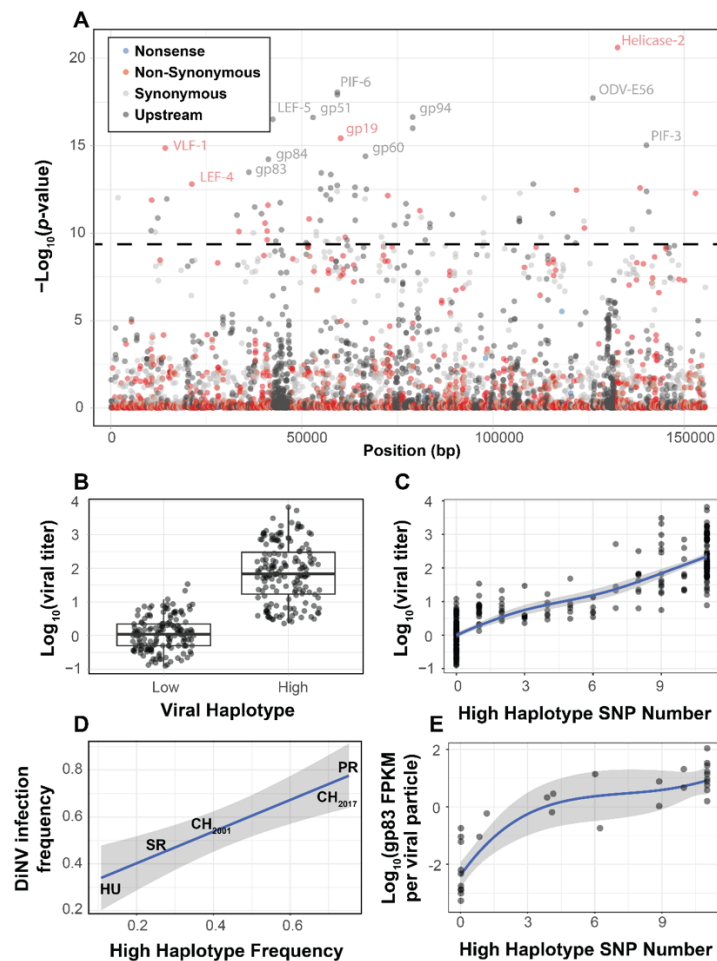

160



161 *The High DiNV viral type suppresses the Drosophila immune system and has elevated virulence*

162 Given the striking difference in viral titer and infection frequencies across populations between High and  
163 Low type viruses, we sought to further characterize the differences in infection dynamics between the types.  
164 We sequenced mRNA from 80 wild *D. innubila* males collected in 2018 (Supplementary Table 2, 40  
165 infected with DiNV, 40 uninfected) and performed a differential expression analysis between infected and  
166 uninfected individuals. Few genes were differentially expressed (DE) between infection states in *D.*  
167 *innubila* (Supplementary Figure 5A,  $p$ -value  $< 0.01$  after FDR multiple testing correction, above the dotted  
168 line), but these DE genes were enriched for several interesting categories. Specifically, we found IMD-  
169 induced antimicrobial peptides (AMPs) were upregulated upon DiNV infection, while one Toll-induced  
170 AMP, and several chorion genes and heat shock proteins were downregulated (Supplementary Figure 5A).  
171 We also compared these results to a laboratory experiment in *D. melanogaster* of differential expression  
172 after infection with a close relative of DiNV (PALMER *et al.* 2018b). These same genes are also differentially  
173 expressed in *D. melanogaster*. Of the 12 genes which are differentially expressed in the same direction in  
174 both species, five are AMPs and five are chorion genes (Supplementary Figure 5B).

175 We then compared gene expression between *D. innubila* infected with High or Low type. We find  
176 17 DE host genes and 9 DE viral genes between types (after controlling for virus copy number as  
177 FPKM/titer, Figure 2, FDR corrected  $p$ -value  $< 0.01$ , GLM  $t$ -value = -4.6239413,  $p$ -value = 9.876143e-05).  
178 Specifically, four Toll-mediated immune peptides (*Listericin*, *IM33*, Bomanins *BomBC2* and *BomT2*) have  
179 reduced expression in High Type infected individuals compared to the Low Type (Figure 2, Supplementary  
180 Figure 6). Finally, viral genes of interest (*PIF-3*, *VLF-1*, *gp83*) have higher expression per viral particle  
181 (FPKM/titer) in the High type compared to the Low type, all also increase in expression per viral particle  
182 (FPKM/titer) as the number of High type alleles increases (Figure 1E & 2,  $t$ -value = 13.732,  $p$ -value 3.36e-  
183 15). This pattern may be driven by the allele of the non-synonymous SNP in *VLF-1* (GLM  $t$ -value = 2.13,  
184  $p$ -value = 0.04272) and the alleles of the SNPs upstream of *gp83*, *PIF-3*, *gp51* and *ODV-E56* (GLM  $t$ -value  
185 = 3.518,  $p$ -value = 0.00162). Together these results suggest that the high viral type has increased expression  
186 of key virulence factors, which in turn, manipulate the expression of host genes involved in immune defense  
187 to result in the observed differences in viral titer. These results suggest that higher *gp83* expression may  
188 cause the lower Toll-mediated AMP expression, possibly due to lowering *Myd88* expression, which in turn  
189 prevents the host from enacting a proper immune response to DiNV infection (Figure 2, Supplementary  
190 Figure 5).

191 *Experimental infections recapitulate differences in viral type virulence*

192 To assess if the virulence of the virus types differs in experimental infections, we performed experimental  
193 infections of *D. innubila* males using viral filtrate of strains infected with one of the two types of DiNV.



194 As infectious viral titer is increased, survival decreases regardless of viral type (Supplementary Figure 7 &  
 195 8, ANOVA residual deviance = 3.536,  $p$ -value = 2.454e-07, Cox Hazard Ratio z-value > 2.227,  $p$ -value <  
 196 0.02592), with survival decreasing as titer increases (Supplementary Figure 7, Cox Hazard Ratio z-value >  
 197 5.428,  $p$ -value < 5.69e-08). In both cases viral titer also increases for the first 3 days of infection (GLM t-  
 198 value = 9.817,  $p$ -value = 3.6e-14).  
 199

200 **Figure 2:** Differential expression of *D. innubila* and DiNV genes between *D. innubila* infected with either  
 201 the Low type or High type DiNV multilocus genotypes. For host genes, the log-fold change of mRNA  
 202 fragments per million fragments is compared, while for viral genes the log-fold change of viral mRNA  
 203 fragments per million fragments per viral particle is compared. Genes are colored/labelled by categories of  
 204 interest, specifically antimicrobial peptides (AMPs), proteins involved in the extracellular matrix and viral  
 205 proteins. Specific genes of interest, such as *Myd88*, are also named. The FDR-correct significance cut-off  
 206 of 0.01 (10,320 tests) is shown as a dashed line.

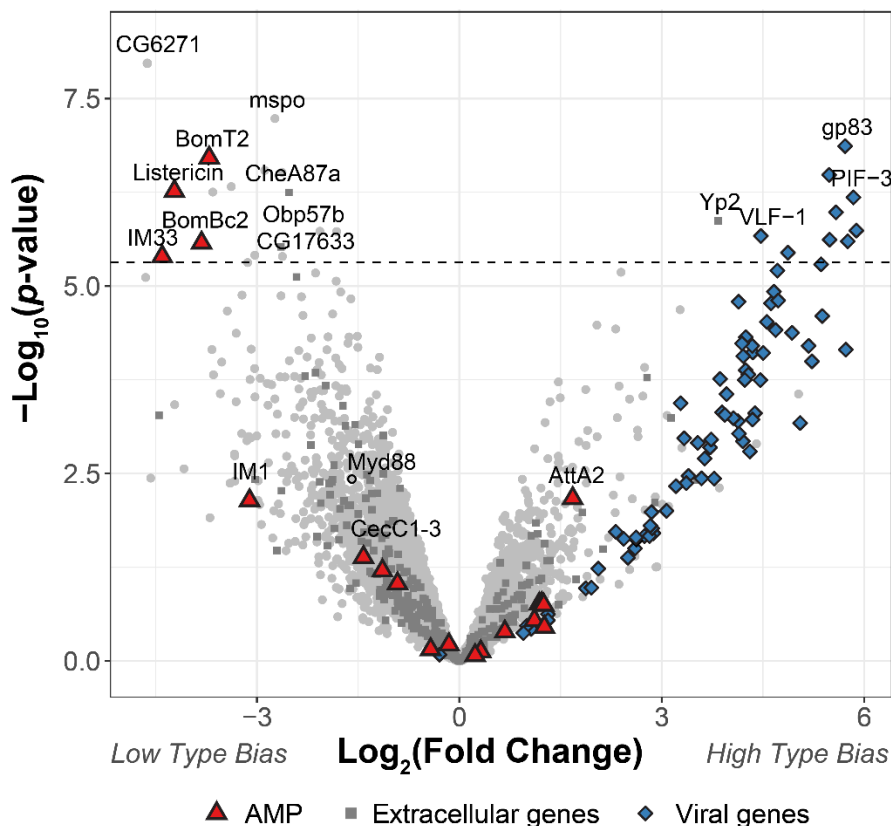

207  
 208 For a set of independent viral isolates, four High type- and four Low type-infected samples, we  
 209 diluted samples to roughly equal concentrations of viral particles (about 0.5 particles per host genome prior

210 to filtration) and performed infections for replicates of 10 males with microneedles dipped in one of the  
211 filtrate samples. Survival is significantly lower for flies infected with High type viruses when compared to  
212 either flies pricked with sterile media (Figure 3A, Cox Hazard Ratio z-value = 3.671  $p$ -value = 0.000242)  
213 or those pricked with Low type virus (Figure 3A, Cox Hazard Ratio z-value = 4.611  $p$ -value = 4e-06). Flies  
214 pricked with Low type virus do not show a significant reduction in survival compared to control flies (Cox  
215 Hazard Ratio z-value = 1.353,  $p$ -value = 0.176). We also measured viral titer over time using qPCR, and  
216 find titer increases through time in flies infected with either type (Figure 3B, GLM  $\text{Log}_{10}(\text{titer}) \sim \text{days} +$   
217 type, days t-value = 9.912,  $p$ -value = 1.76e-14). Flies infected with High type virus have significantly higher  
218 viral titer compared to flies infected with Low type virus (Figure 3B, GLM  $\text{Log}_{10}(\text{titer}) \sim \text{days} + \text{type}$ , type  
219 t-value = 3.934,  $p$ -value = 0.000211). These results suggest that while the High type strain has higher viral  
220 titer and potentially higher transmission rate in wild flies, it also has higher virulence, even after controlling  
221 for initial infection titer.

222 **Figure 3:** Effect of viral type in experimental infections. **A.** Survival curves of *D. innubila* infected with  
223 high and low viral types compared to control flies pricked with sterile media, for 15 days post infection.  
224 Survival 5 days post-infection separated by strain is shown in Supplementary Figure 8. **B.** qPCR copy  
225 number of viral *p47* relative to *tpi* in *D. innubila* infected with DiNV filtrate of high and low types.

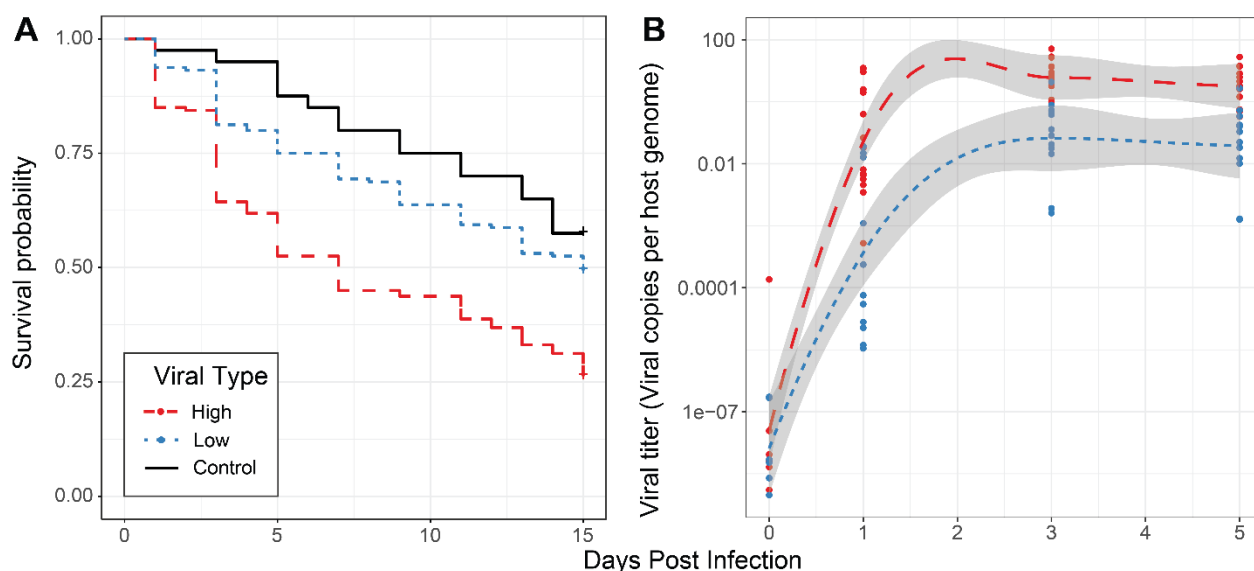

226

227 *DiNV* types are under strong selection in the host

228 Recombination is required during nudivirus replication and recombination start sites can be at any point  
229 in the single chromosome circular genome (KELLY 1982; ROHRMANN 2013). These factors likely cause  
230 the incredibly high recombination rates observed in nudiviruses (BLISSARD AND ROHRMANN 1990;  
231 WANG AND JEHL 2009; ROHRMANN 2013). In DiNV, the eleven key SNPs that distinguish the High and  
232 Low haplotypes are spread across the genome yet are nearly perfectly linked. In contrast, other SNPs in

233 the genome have relatively low linkage disequilibrium, suggesting that selection to maintain each  
234 haplotype is strong (Supplementary Figure 4 and 9).

235 Using McDonald-Kreitman based statistics for detecting selection (MCDONALD AND KREITMAN  
236 1991; STOLETZKI AND EYRE-WALKER 2011; EILERTSON *et al.* 2012), we tested whether genes that are  
237 associated with the High and Low haplotypes exhibited different signatures of natural selection compared  
238 to other viral genes. Envelope and virulence proteins show significantly elevated signatures of adaptation  
239 (Figure 4, envelope & virulence versus background paired T-test t-value = 2.1761,  $p$ -value = 0.03814).  
240 Genes found in the initial GWAS for virulence, which defined the High and Low types (such as VLF-1,  
241 PIF-3, LEF-4 and LEF-5) have significantly higher rate of substitutions being fixed due to selection than  
242 background genes (Figure 4, type-associated genes versus all other, t-value = 2.718,  $p$ -value = 0.00068).

243 We also performed a GWAS using the host polymorphism and find few associated SNPs, after  
244 controlling for the viral haplotype (Supplementary Figure 10). Consistent with the arms race model, host  
245 genes we suspect are interacting with DiNV (such as the GWAS hits, AMPs, chorion genes, piRNA genes  
246 and extracellular genes) show elevated levels of substitutions fixed by selection compared to background  
247 genes in *D. innubila* (Figure 4 & Supplementary Figure 1). Finally, DE chorion genes, extracellular genes  
248 and AMPs have significantly more adaptive substitutions than similar non-DE genes (Figure 4, blue dots,  
249 differentially expressed versus all other T-test: *D. innubila* t-value = 4.755,  $p$ -value = 0.000671). Overall  
250 these results suggest strong selection is acting on both the host to suppress viral activity and the virus to  
251 escape this suppression.

### 252 *The High viral type of DiNV evolved repeatedly in three D. innubila populations*

253 We next sought to understand the evolutionary origin of the two types. Given that both types are found in  
254 all populations surveyed (Figure 1D), we hypothesized that this could occur one of three ways: First, the  
255 derived haplotype was present ancestrally and has been maintained since before geographic isolation  
256 occurred. Second, the derived haplotype evolved following geographic isolation and has spread via  
257 migration between locations. Third, the derived haplotype has recurrently evolved in each location.

258 To distinguish between these possibilities and determine the timeframe of divergence, we used the  
259 site frequency spectrum of silent DiNV polymorphism to estimate effective population size backwards in  
260 time for all populations (LIU AND FU 2015). We find three populations (CH, HU and SR) expand from a  
261 single viral particle ( $N_e = 1$ ) to millions of particles during the last glacial maximum (30-100 thousand years  
262 ago) when *D. innubila* settled its current range (Supplementary Figure 11). This supports a single invasion  
263 event during a host-range change. PR appears to expand between 1 and 10 thousand years ago, suggesting  
264 a much more recent bottleneck during the range expansion in PR (Supplementary Figure 11) (HILL AND  
265 UNCKLESS 2020).

266 We aligned genomic regions containing SNPs to two related nudiviruses, *Kallithea virus* and  
267 *Oryctes rhinoceros Nudivirus* (OrNV) (WANG *et al.* 2008; HILL AND UNCKLESS 2018; PALMER *et al.*  
268 2018b). The High haplotype alleles are not present in either *Kallithea* or OrNV, and are not found in short  
269 read information for wild *D. melanogaster* infected with *Kallithea virus* (WEBSTER *et al.* 2015), suggesting  
270 they are derived in DiNV.  
271

272 **Figure 4:** Genes implicated in host/virus interaction are rapidly evolving by positive selection in the  
273 Chiricahua population. Difference in selection effect for viral and host gene categories of interest, and  
274 nearby background genes, as indicated by the proportion of substitutions fixed by adaptation, weighted by  
275 mutations in SnIPRE (EILERTSON *et al.* 2012). Genes that have associated SNPs from the GWAS are  
276 highlighted in red, while genes which are differentially expressed upon infection, or between viral types  
277 are labelled in blue. All GWAS hits are also differentially expressed and labelled in red. Genes of interest  
278 are named.

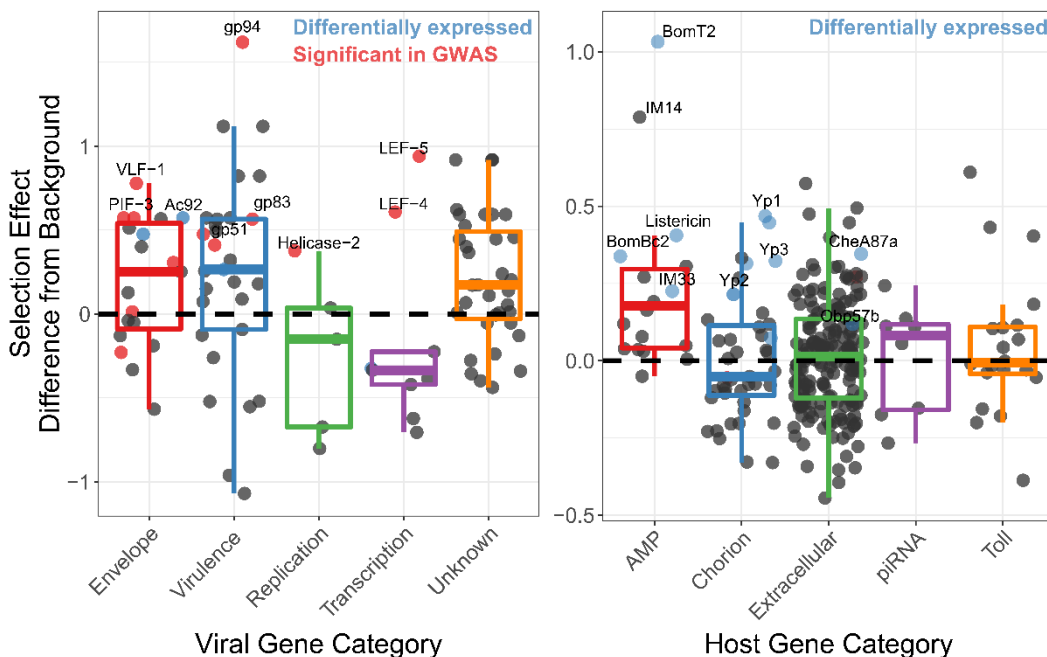

279  
280 We generated consensus DiNV sequences for each infected *D. innubila* individual and created a  
281 whole genome phylogeny to infer geographic diffusion of samples using BEAST (BOUCKAERT *et al.* 2014).  
282 We then performed ancestral reconstruction of the presence of the High type across the phylogeny using  
283 APE (PARADIS *et al.* 2004). Our samples group as three populations (with HU and SR forming one  
284 population) and, consistent with our expectation, the Low type is the ancestral state (Figure 5A).  
285 Surprisingly, the High type appears to have evolved repeatedly and convergently within each population,

286 forming separate groups within each population (Figure 5A). The High type also clusters within each  
287 population in a principal component analysis of all viral SNPs (Supplementary Figure 9), and when  
288 repeating these analyses while excluding the eleven focal SNPs.

289 We next surveyed each background SNP (not associated with the High or Low type) to determine  
290 if the general background supports one of the three outlined ways in which the High type evolved and  
291 spread in each location. We grouped SNPs by their presence in just the High type or Low type (supporting  
292 a single origin and spread by migration) or if they were unique to a single population but shared between  
293 the High and Low types (supporting recurrent evolution with recombination).

294 In total, 391 SNPs (28% of SNPs surveyed) are unique to a single population yet are still shared  
295 between both High and Low types (Figure 5 and Supplementary Figure 9), compared to 23 SNPs shared  
296 between locations but exclusive to High type samples.

297 These unique SNPs (161 for CH, 127 for HU and SR, and 53 for PR), are present in all High type  
298 samples of a population but a variable proportion of Low types for that population (between 19% and 94%)  
299 and are unique to that population. This pattern fits with the High type recurrently evolving on a single  
300 background (a different background in each location), supporting recurrent evolution of the High type. The  
301 population-specific background SNPs are spread throughout the DiNV genome, with little evidence of  
302 recombination with the high type SNPs, making it unlikely that these SNPs recombined onto different  
303 backgrounds (Supplementary Figure 4).

304 Though there is strong linkage between the High type SNPs, they are not perfectly associated with  
305 each other (Supplementary Figure 4). Using this slight disassociation and APE (PARADIS *et al.* 2004), we  
306 performed ancestral reconstruction of SNP origins in each population (assuming recurrent evolution) and  
307 find that, excluding three variable SNPs, the evolution of these SNPs was the same order in each population  
308 (Figure 5B).

309 To determine if this recurrent evolution is plausible in our estimated timeframe (~10,000 years),  
310 we simulated viral populations using a modified discrete SIR model using deSolve (SOETAERT *et al.* 2010)  
311 with estimated baculovirus mutation rates, ranges of viral titer taken our samples and estimated population  
312 sizes for each viral population (parameters described in the methods). In this model we used an effective  
313 mutation rate scaled to viral titer, considering the mutation rate per particle, so total mutations per  
314 generation increase with viral titer. The simulations suggest that waiting time for the first mutation that  
315 increases titer is highly variable between replicates but usually occurs within 1000 generations (~200 years  
316 assuming 5 generations per year, in >99.1% of replicates, Figure 5C). The average wait time for each  
317 subsequent mutation decreases monotonically (GLM t-value = -2.389, *p*-value = 0.03686). In each case,  
318 the next mutation appears in the background of the previous high titer mutation (Figure 5C) due to the  
319 elevated effective mutation rate and increased basic reproduction number ( $R_0$ ). The accumulation of

320 mutations therefore occurs at a geometric (approximately exponential) rate. Additionally, the standard  
321 deviation of time wait times also decreases with each new mutation (GLM t-value = -2.441,  $p$ -value =  
322 0.04241), increasing the certainty that the entire multilocus genotype will appear in a population rapidly  
323 once the initial mutations appear. This chain reaction of adaptation facilitates the repeated evolution of the  
324 virulent High type independently in three populations, with all eleven mutations fixing in a population  
325 within 6000 generations (~1200 years) in all replicates (3372 generations on average, ~675 years), a  
326 plausible amount of time given our estimated timeframe.

327 *Both viral types are found in two other Drosophila species and have also evolved in a geographically*  
328 *distinct population*

329 Since we find two types of DiNV are maintained, and that other species are infected with DiNV, we  
330 hypothesized that another species could be a reservoir for the less effective Low type. We chose to study  
331 *D. azteca* from the Chiricahuas since it is frequently infected with DiNV (~33% infection), overlaps with  
332 *D. innubila*, and is genetically divergent (40-60 million years) which could mean a very different genetic  
333 interaction between host and virus (UNCKLESS 2011). We also examined DiNV-infected *D. falleni*  
334 (collected in Georgia) as an outgroup. In all, we sequenced 36 *D. azteca* and 56 *D. falleni*. Both types are  
335 present in all examined species, but the high type is rare in *D. azteca* (Figure 6B). The High type has a  
336 significantly higher titer than the low type in all cases (Figure 6A). Viral titer is not significantly different  
337 across species for either High or Low type (Figure 6A, GLM t-value = -1.351,  $p$ -value = 0.179). We also  
338 find the *D. azteca* samples cluster with CH *D. innubila* samples and contain the CH background SNPs  
339 (Supplementary Figure 9C), suggesting no differentiation in the virus infecting different species.  
340 Interestingly, *D. falleni* DiNV clusters completely separately from the other samples, likely due to its  
341 geographic separation, but still has a derived cluster of High type virus, suggesting a fourth separate  
342 evolution of the High type in Georgia. Despite the lack of difference between species samples in Arizona,  
343 a lower proportion of the *D. azteca* population is infected with DiNV, and the High Type is less common  
344 than the Low type DiNV (Figure 6B). Thus perhaps, even though the relative differences in titer are  
345 preserved between the two species, the Low Type is favored in *D. azteca* because this reduced virulence  
346 leads to a greater  $R_0$  in *D. azteca*. Thus, the two types of the virus may be maintained in both host species  
347 because though they have become specialized to maximize fitness in one host, messy transmission between  
348 host species could lead to their continued presence in both hosts.

349 We also repeated the GWAS for viral titer in DiNV infecting *D. azteca* and *D. falleni*. In both cases  
350 we again found the 11 High type SNPs associated with viral titer (GLM t-value > 4.28,  $p$ -value > 0.0001 in  
351 both cases), but not the *Helicase-2* SNP (despite its presence in *D. falleni* DiNV samples). After controlling  
352 for the High type, we find no other significant DiNV SNPs in *D. azteca* associated with viral titer. For



353 DiNV infecting *D. falleni*, we find 478 significant SNPs (FDR corrected  $p$ -value < 0.01), though none of  
354 them with as large an effect as the High type associated SNPs.  
355

356 **Figure 5:** The evolution and maintenance of two viral types. **A.** Phylogeographic reconstruction of the  
357 spread of DiNV through *D. innubila*, rooted on the Kallithea virus reference sequence, including a  
358 reconstruction of the High type evolution (with strains containing all 11 High type variants shown in red,  
359 strains with an intermediate number of high type variants are shown in pink, and strains with no high type  
360 variants are shown in black). Branches are colored when the SNPs found in the background for each High  
361 haplotype are present in the population, showing that the background differs per population. Black  
362 branches show states where branch tips do not contain all the shared High/Low population specific  
363 background SNPs. **B.** Order of mutations in the viral haplotype appearing in each population. Apart from  
364 three mutations the order is consistent between locations. **C.** The number of generations needed for ‘High  
365 titer’ mutations to evolve in simulated populations, given that each mutation increases the mutation rate.  
366 The number of generations between each mutation appearing decreases as titer increases.

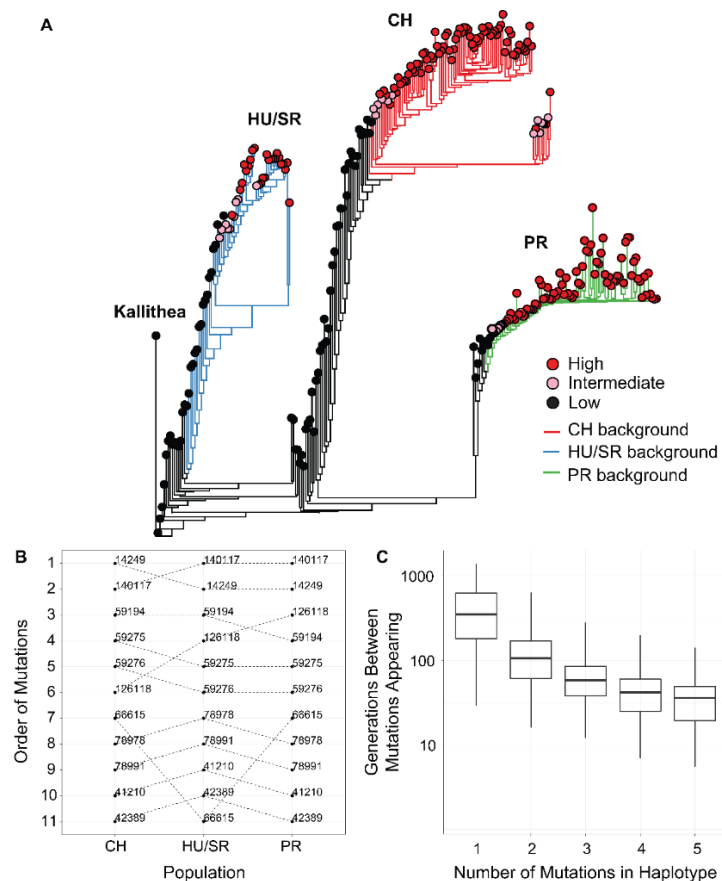

367  
368

369 **Figure 6: A.** Viral titer for CH samples of *D. azteca*, *D. falleni* and *D. innubila* infected with High and Low  
 370 type DiNV. **B.** Proportion of *D. azteca* and *D. innubila* 2017 CH population infected with High and Low  
 371 type DiNV.

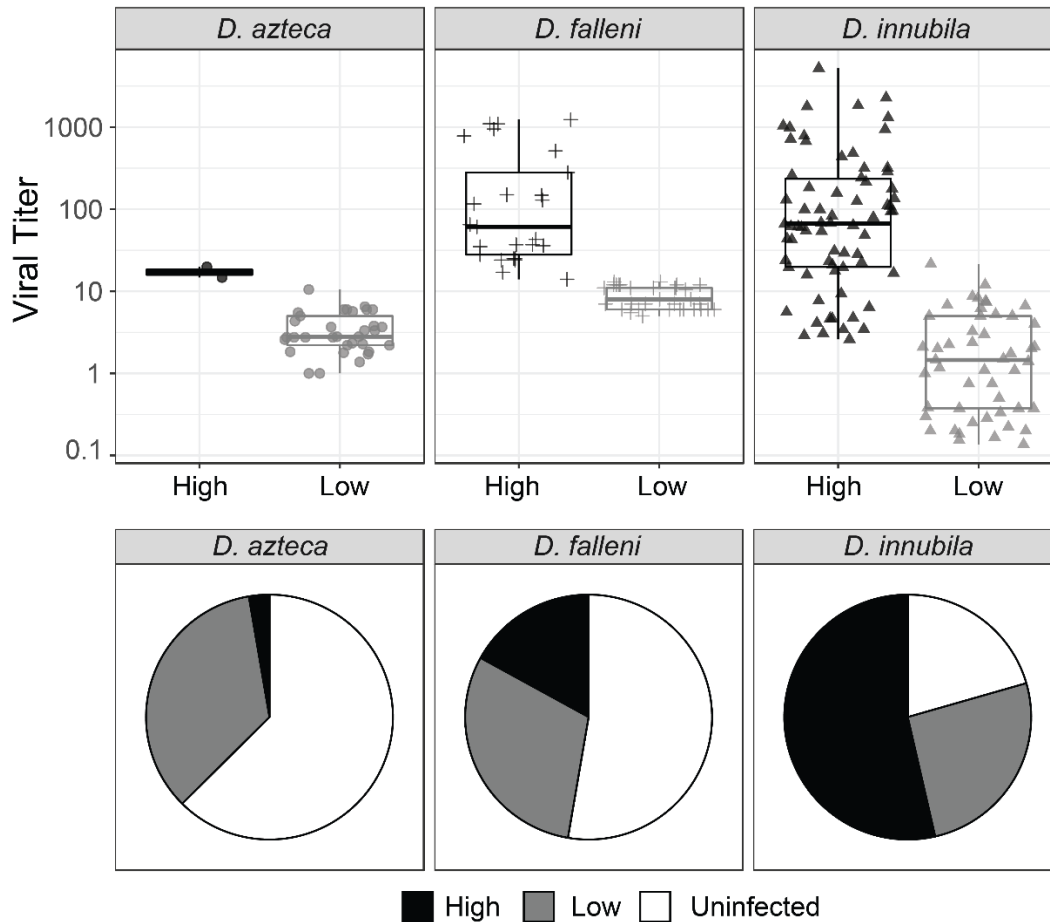

372  
 373 *Two DiNV types may be maintained due to a trade-off between transmission and virulence*  
 374 Given the ease that the High type appears to evolve recurrently in populations (Figure 5C), its apparent  
 375 association with increased infection frequency, and its apparent inability to coinfect with the low type, it is  
 376 surprising that the High type has not outcompeted the Low type. There are several possible explanations  
 377 for the maintenance of the two types. First, a soft selective sweep may be occurring on the High type, where  
 378 recurrent mutation followed by a change in environment changes the fitness of the High type that will  
 379 eventually result in its fixation (HERMISSON AND PENNINGS 2005). Second, both types may be maintained  
 380 due to a trade-off (ALIZON AND VAN BAALEN 2008). Such a trade-off might even be associated with  
 381 frequency-dependent selection and cycling frequencies over time. This trade-off could involve different  
 382 transmission and virulence strategies or might be related to specific adaptation to different hosts.

383 In a simple model of viral infection dynamics, the success of the virus is measured by its basic  
 384 reproduction number ( $R_0$ ) which is the ratio of the instantaneous transmission rate ( $\beta$ ) to the virulence of  
 385 the virus ( $\gamma$ ). If there is a trade-off between transmission and virulence, we might expect that although the

386 High type has a higher instantaneous rate of transmission, it also has higher virulence, killing infected  
387 individuals before they can infect other possible hosts. In contrast, those infected with the Low type persist  
388 with the infection and can therefore transmit proportionally more virus due to more interactions with  
389 susceptible individuals, despite a lower instantaneous transmission rate. To test this, we simulated  
390 populations with two viral types using a modified SIR model in deSolve (SOETAERT *et al.* 2010). We varied  
391 transmission and virulence rates and estimated sets of parameters in which types are maintained within  
392 populations. We find that a stable infection frequency depends on both the magnitude of instantaneous  
393 transmission rate, and the  $R_0$ , with higher transmission rates increasing the infection frequency, to a  
394 maximum of  $1 - (\gamma / \beta)$  (Figure 7A). The total infected proportion effectively saturates due to the increased  
395 death rate (virulence) of infected individuals, suggesting a trade-off between transmission and virulence as  
396 titer increases (Figure 7A). This is consistent with our results in experimental infections in DiNV  
397 (Supplementary Figures 7 & 8, Cox Hazard Ratio z-value > 2.227,  $p$ -value < 0.02592), and other theoretical  
398 treatments (MAY AND NOWAK 1995; ALIZON AND VAN BAALEN 2008). Two types are only maintained  
399 when the  $R_0$  is equal for each type ( $\gamma_1/\beta_1 = \gamma_2/\beta_2$ ). As the transmission rate of the High type increases, it  
400 infects a larger proportion of the population and outcompetes the Low type (with High and Low types at  
401 equal proportions when the transmission rates equal), the High type proportion saturates due to the equally  
402 increasing virulence rate which keeps the  $R_0$  equal to the Low type (Figure 7A). Given the requirement for  
403 an equal  $R_0$  for maintenance, the actual proportion of individuals infected with each type depends on the  
404 starting infection frequencies of each type and the difference in absolute transmission rate (Figure 7B).  
405 Based on the infection frequencies of our sampled populations, we suspect that the High type was able to  
406 evolve earlier in the recently bottlenecked PR population (consistent with the High type background being  
407 shared with 94% of PR Low types), or the absolute transmission rate (and virulence rate) may have  
408 increased in PR population, which is likely what has occurred in CH over time (Figure 7B). Together this  
409 suggests that differences in population infection frequencies may depend on a combination of demographic  
410 factors, host genetic factors and the instantaneous transmission rate in each population (with lower  
411 transmission rates in HU and SR compared to PR and CH). This also implies there is a limit to how virulent  
412 a strain can become before it becomes detrimental, as even with higher transmission rates per individual,  
413 DiNV may kill the host before it can transmit, reducing its basic reproduction number ( $R_0$ ).

#### 414 **Discussion**

415 Viruses are constantly evolving not just to better infect their host, but also to optimize their infection, to  
416 infect as many individuals as possible without preventing the transmission to new hosts (MAY AND NOWAK  
417 1995; LIPSITCH *et al.* 1996; ALIZON AND VAN BAALEN 2008). Since the host is also evolving in response  
418 to the virus, an evolutionary arms-race often ensues (DAWKINS AND KREBS 1979; KALTZ AND SHYKOFF

419 1998; DAUGHERTY AND MALIK 2012). Here, to work towards expanding our understanding of the co-  
420 evolution of viruses and their hosts, we examine the population dynamics of *Drosophila innubila* Nudivirus  
421 (DiNV), a DNA virus infecting *D. innubila* (UNCKLESS 2011). DNA viruses have large genomes and often  
422 recombination, placing them as a somewhat transitional pathogen between RNA viruses, bacteria and  
423 eukaryotic pathogens and parasites. Within our set of viral samples, we find two DiNV haplotypes which  
424 differ by 11 SNPs (Figure 1, named High and Low types). One haplotype (the High type) is associated with  
425 higher viral titer, likely due to an increased manipulation of the host immune system and increased  
426 expression of viral factors. This derived (High type) has likely recurrently evolved in each population since  
427 the last glacial maximum (~10,000 years ago). The two types appear to be incompatible to some degree, as  
428 we find little evidence of co-infections, and mutations appear in a similar order as if navigating an epistatic  
429 fitness landscape (DOBZHANSKY 1937; KONDRASHOV *et al.* 2002; GAVRILETS 2004). Finally, despite the  
430 higher titer and transmission rate of the High type, we find that the two types are maintained in all  
431 populations sampled, possibly because the increased viral titer also increases the virulence, leading to  
432 similar basic reproduction numbers in the High and Low type (ALIZON AND VAN BAALEN 2008).

433 If the reproduction rate,  $R_0$ , was equal between the two viral types we would expect the infection  
434 frequencies to be equal in our sampled populations, which is not the case. This could be caused by the  
435 starting frequencies of each type not being equal (with the Low type starting at a higher frequency, Figure  
436 7). There could also be time or host dependent variation, so over time (and between locations), changes in  
437 the environment could alter transmission rates of each type, also altering the ratio of High type to Low type.  
438 We also do not consider frequency dependent selection in our model, where the transmission rate depends  
439 on an interaction between the infection frequencies of the two types.

440 The  $R_0$  could be similar between types, but not identical, resulting in slow changes in the ratio of  
441 types over time (as seen between 2001 and 2017, Figures 1D & 7). As we only have two time points, we  
442 could be witnessing a selective sweep of the High type spreading to fixation (NIELSEN 2005), with  
443 recombination causing the observed differences in the background. As we find the High type appears to  
444 have evolved recurrently, it would be unlikely that we have caught these sweeps partway through in all four  
445 populations sampled (Figure 1D). Using the frequency of the High type between 2001 and 2017 CH  
446 samples, we can calculate the selection coefficient for the High type if increasing at an exponential rate  
447 (which is likely given the intermediate frequency at both time points, Figure 7B). If we assume 5  
448 generations per year and an increase among infected individuals from 39% on 2001 to 71% in 2017, the  
449 selection coefficient = 0.007, which suggests the High type would take ~275 years to fix in a population  
450 once it has arisen. Given the coalescence time of the two types is close to the expansion time of the two  
451 viruses (2-30 thousand years), this does not fit with our results, suggesting the two types are being

452 maintained and not sweeping. Further, if the High type was sweeping, it would be remarkable for us to  
 453 catch these sweeps occurring in all four populations sampled, given our estimated time to fixation.

454

455 **Figure 7:** Simulated infected populations to determine parameters of stable infection frequencies of two  
 456 viral types. **A.** The frequency of stable infection, given the ratio of virulence to transmission, for different  
 457 magnitudes of transmission but the same starting frequency (0.001%). **B.** Stable infection frequencies given  
 458 the difference in transmission rates ( $\beta$ ) between two viral strains, as strain 2 transmission rate (starting  
 459 frequency 0.001%) increases relative to strain 1 transmission rate (starting frequency 25%). The difference  
 460 in infection frequencies of each strain given differing transmission rates of both strains. Stacked bars show  
 461 the observed frequencies of High type infection (Strain 2, Blue), Low type infection (Strain 1, Red) and  
 462 Uninfected (Grey) for four sampled populations, positioned on the X-axis to show the estimated ratio of  
 463 transmission rates for High and Low type, based on the infection frequencies.

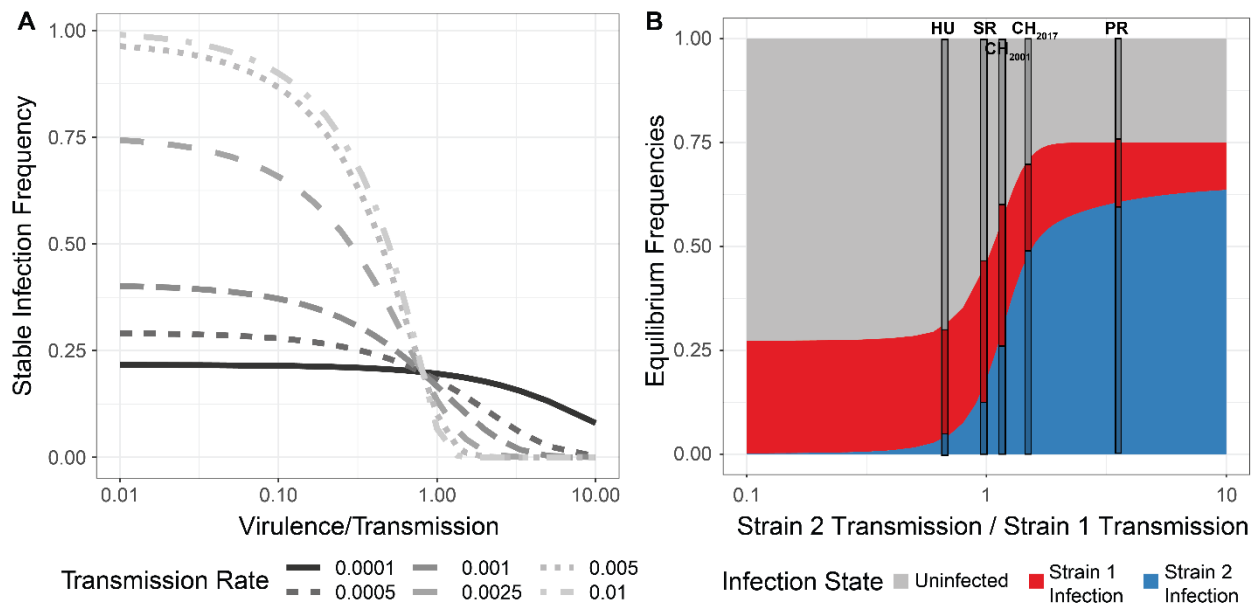

464

465

466 Previous surveys of nudivirus evolution found that a few replication-related genes (including *VLF-*  
 467 *I* and *ODV-E56*), likely key targets for host suppression, are under recurrent positive selection (HILL AND  
 468 UNCKLESS 2017; HILL AND UNCKLESS 2018). Given that these repeatedly rapidly evolving genes are also  
 469 associated with the High and Low types and show the highest levels of adaptation (Figure 1, Figure 4), it is  
 470 entirely possible that these genes are key factors for infection in nudiviruses. They may also be associated  
 471 with virulence in other nudiviruses or baculoviruses. It is interesting that we find the same SNPs recurrently  
 472 evolving in each population, opposed to different SNPs affecting the same genes in each population.

473 One important factor for DNA virus replication is the *Helicase* gene (BLISSARD AND ROHRMANN  
474 1990; ROHRMANN 2013), and we find variation in *Helicase-2* is associated with viral titer in our survey  
475 (Figure 3A & C). As in other nudiviruses, there is extensive adaptive evolution in the *Helicase* gene (Figure  
476 4A) (HILL AND UNCKLESS 2017; HILL AND UNCKLESS 2018) which has previously been posited to be  
477 associated with change in host range (MAEDA *et al.* 1993; CROIZIER *et al.* 1994; ARGAUD *et al.* 1998;  
478 AFONSO *et al.* 2001). It is possible the *Helicase-2* variants allow for optimized infection of different species  
479 (CROIZIER *et al.* 1994). In fact, DiNV infects several *Drosophila* species in the New World at varying  
480 frequencies (including high prevalence in *D. munda*) (UNCKLESS 2011), and so could have an alternate  
481 variant reservoir in any species, with some migration into *D. innubila* (but not *D. azteca* or *D. falleni*),  
482 resulting in the appearance of two competing strains. However, this hypothesis ignores the existence of the  
483 high and low types which appear to explain the difference in viral titer across multiple species much more  
484 convincingly than the *Helicase-2* polymorphism (Supplementary Figure 2).

485 Nudiviruses have extremely high rates of recombination, as they require at least one crossover  
486 during their replication (ROHRMANN 2013). Given this high rate of recombination, it is interesting we don't  
487 find more intermediate strains with a mix of High and Low SNPs, supporting the idea of an incompatibility  
488 or negative epistatic interactions between SNPs of the two types, similar to a Dobzhansky-Muller  
489 incompatibility (GAVRILETS 2003).

490 Some models suggest that viruses are under constant selection to maintain an optimum ratio of  
491 virulence to transmission (MAY AND NOWAK 1995; LIPSITCH *et al.* 1996; ALIZON AND VAN BAALEN 2008).  
492 This delicate balance of transmission to virulence could be disrupted with the evolution of a second, high-  
493 titer, viral type. In the case of DiNV, the High type has radically higher virulence and appears to compete  
494 with the first type impacting the persistence of the virus in a host population. Additionally, the High type  
495 appears to recurrently evolve, frequently affecting the persistence of the virus (Figure 5 & 6, Supplementary  
496 Figure 9). This posits a situation where the optimum strategy for the ancestral viral type is a reduced  
497 transmission rate and the fixation of mutations that are incompatible with High type mutations. Further, this  
498 fits with the observed consistent order of fixation for mutations that form the High type (Figure 5B), similar  
499 to navigating the neutral adaptive landscape between two incompatible forms in a Bateson-Dobzhansky-  
500 Muller incompatibilities (DOBZHANSKY 1937; ORR 1995; ORR AND TURELLI 2001; GAVRILETS 2003; ORR  
501 2004). This type of viral type interaction is rarely considered in models used for studying infection and  
502 could lead to a better understanding of viral dynamics and host-virus co-evolution (JACKSON *et al.* 2005;  
503 JACKSON 2009).

504 DNA viruses such as DiNV have complicated replication cycles and large genomes. This makes  
505 them a sort of evolutionary intermediate between RNA-viruses (small genomes, high mutation rates) and  
506 eukaryotes (large genomes, low mutation rates) and tangential to bacteria and archaea (intermediate



507 genomes, low recombination rates). However, adaptation appears to occur through changes in a few key  
508 proteins. Here we find the evolution of two competing viral types that differ in these few key genes. These  
509 viral types are maintained in populations likely due to a trade-off between transmission and virulence.  
510 Overall our results suggest that the high mutation rates and extremely high levels of selection can result in  
511 the repeated and convergent evolution of novel host-virus interactions. Additionally, we find that these  
512 host-virus interactions for large DNA viruses can be much more complicated than previous models suggest  
513 (DOLAN *et al.* 2018; FEDER *et al.* 2019).

## 514 **Materials and Methods**

### 515 *Fly collection, DNA isolation and sequencing*

516 In this study we used previously collected and sequenced *D. innubila* (HILL AND UNCKLESS 2020). Briefly  
517 we collected these flies across the four mountainous locations in Arizona between the 22nd of August and  
518 the 11th of September 2017. Specifically, we collected at the Southwest research station in the Chiricahua  
519 mountains (~5,400 feet elevation, 31.871 latitude -109.237 longitude), Prescott National Forest (~7,900  
520 feet elevation, 34.540 latitude -112.469 longitude), Madera Canyon in the Santa Rita mountains (~4,900  
521 feet elevation, 31.729 latitude -110.881 longitude) and Miller Peak in the Huachuca mountains (~5,900 feet  
522 elevation, 31.632 latitude -110.340 longitude). Baits consisted of store-bought white button mushrooms  
523 (*Agaricus bisporus*) placed in large piles about 30cm in diameter, at least 5 baits per location. A sweep net  
524 was used to collect flies over the baits in either the early morning or late afternoon between one and three  
525 days after the bait was set. Flies were sorted by sex and species at the University of Arizona and were flash  
526 frozen at -80°C before being shipped on dry ice to the University of Kansas in Lawrence, KS. During these  
527 collections we also obtained *D. azteca* during collections which we also sorted by species and sex and flash  
528 froze. *D. falleni* were collected using a similar method in the Smoky Mountains (~6,600 feet elevation) in  
529 Georgia in 2017 by Kelly Dyer, these flies were then sorted at the University of Georgia in Athens GA and  
530 shipped on dry ice to the University of Kansas in Lawrence, KS.

531 For collected *D. falleni* and *D. azteca*, we attempted to assess the frequency of DiNV infection  
532 using PCR, looking for amplification of the viral gene *p47*. Using primers from (UNCKLESS 2011), P47F:  
533 5'-TGAAACCAGAATGACATATATAACGC and P47R: 5'-TCGGTTTCTCAATTAAGTTGATAGC.  
534 We used the following conditions: 95°C 30 seconds, 55°C 30 seconds, 72°C 60 seconds per cycle for 35  
535 cycles.

536 We sorted 343 *D. innubila* flies, 60 DiNV positive *D. falleni* and 40 DiNV positive *D. azteca* which  
537 we then homogenized and used to extract DNA using the Qiagen Genra Puregene Tissue kit (USA Qiagen  
538 Inc., Germantown, MD, USA). We prepared a genomic DNA library of these 343 DNA samples using a  
539 modified version of the Nextera DNA library prep kit (~ 350bp insert size, Illumina Inc., San Diego, CA,

540 USA) meant to conserve reagents. We sequenced the *D. innubila* libraries on two lanes of an Illumina  
541 HiSeq 4000 run (150bp paired-end) (Data to be deposited in the SRA). We sequenced the *D. falleni* and *D.*  
542 *azteca* libraries on a separate run of a lane of an Illumina HiSeq 4000 (150bp paired-end).

543 For 80 male *Drosophila innubila* collected in 2018 (indicated in Supplementary Table 2), we split  
544 the sample homogenate in half, isolated DNA from half as described above and isolating RNA using the  
545 Direct-zol RNA Microprep protocol (R2061, ZymoResearch, Irvine, CA, USA). We then prepared a cDNA  
546 library for each of these 80 RNA samples using a modified version of the Nextera TruSeq library prep kit  
547 meant to conserve reagents and sequenced these samples on a NovaSeq NS6K SP 100SE (100bp single  
548 end). We also sequenced DNA for these samples, with DNA isolated and prepared as above, also sequenced  
549 on a NovaSeq NS6K SP 100SE (100bp single end) (Data to be deposited in the SRA).

### 550 *Sample filtering, mapping and alignment*

551 Following sequencing, we removed primer and adapter sequences using cutadapt (MARTIN 2011) and  
552 Scythe (BUFFALO 2018) and trimmed all data using Sickle (-t sanger -q 20 -l 50) (JOSHI AND FASS 2011).  
553 We masked the *D. innubila* reference genome (HILL *et al.* 2019), using *D. innubila* TE sequences and  
554 RepeatMasker (SMIT AND HUBLEY 2008; SMIT AND HUBLEY 2013-2015). We then mapped short reads to  
555 the masked genome and the *Drosophila innubila* Nudivirus genome (DiNV) (HILL AND UNCKLESS 2018)  
556 using BWA MEM (LI AND DURBIN 2009) and sorted using SAMtools (LI *et al.* 2009). Following this we  
557 added read groups, marked and removed sequencing and optical duplicates, and realigned around indels  
558 in each mapped BAM file using GATK and Picard ([HTTP://BROADINSTITUTE.GITHUB.IO/PICARD](http://broadinstitute.github.io/picard) ;  
559 MCKENNA *et al.* 2010; DEPRISTO *et al.* 2011). We considered lines to be infected with DiNV if at least  
560 95% of the viral genome is covered to at least 10-fold coverage. We then filtered for low coverage and  
561 mis-identified species by removing individuals with low coverage of the *D. innubila* genome (less than 5-  
562 fold coverage for 80% of the non-repetitive genome), and individuals we suspected of being misidentified  
563 as *D. innubila* following collection. This left us with 318 *D. innubila* wild flies with at least 5-fold  
564 coverage across at least 80% of the euchromatic genome, of which 254 are infected with DiNV  
565 (Supplementary Table 1). We also checked for read pairs which were split mapped between the DiNV  
566 genome and the *D. innubila* genome using SAMtools.

567 For *D. falleni* we used a previously generated *D. innubila* genome with *D. falleni* variants  
568 inserted (HILL *et al.* 2019). We masked the genome with Repeatmasker (SMIT AND HUBLEY 2013-2015)  
569 and mapped short reads to the masked genome, the repeat sequences and the DiNV genome using BWA  
570 MEM and SAMtools (LI AND DURBIN 2009; LI *et al.* 2009). Then, as with *D. innubila* we filtered for low  
571 coverage and mis-identified species by removing individuals with low coverage (less than 5-fold

572 coverage for 80% of the non-repetitive genome) leaving us with 56 *D. falleni* samples infected with  
573 DiNV.

574 For *D. azteca*, we downloaded the genome from NCBI (Accession: GCA\_005876895.1) which  
575 we then called repeats from with RepeatModeler (SMIT AND HUBLEY 2008). We masked the genome with  
576 Repeatmasker (SMIT AND HUBLEY 2013-2015) and mapped short reads to the masked genome, the repeat  
577 sequences and the DiNV genome using BWA MEM and SAMtools (LI AND DURBIN 2009; LI *et al.*  
578 2009). As with *D. innubila* we then filtered for low coverage and mis-identified species by removing  
579 individuals with low coverage of the *D. azteca* genome (less than 5-fold coverage for 80% of the non-  
580 repetitive genome), which left us with 37 *D. azteca* samples infected with DiNV. We then called DiNV  
581 variation using LoFreq (WILM *et al.* 2012).

#### 582 *Calling nucleotide polymorphisms across the population samples*

583 For the 318 sequenced samples with reasonable coverage, for host polymorphism, we used the previously  
584 generated multiple strain VCF file, generated using a standard GATK HaplotypeCaller/BCFTools pipeline.  
585 We used LoFreq (WILM *et al.* 2012) to call polymorphic viral SNPs within each of the 254 DiNV infected  
586 samples, following filtering using BCFtools to remove sites below a quality of 950 and a frequency less  
587 than 5%. We then merged each VCF to create a multiple strain VCF file, containing 5,283 SNPs in the  
588 DiNV genome. The LoFreq VCF (WILM *et al.* 2012) output contains estimates of the frequency of each  
589 SNP in DiNV in each sample, to confirm these frequencies, in SAMtools (LI *et al.* 2009) we generated  
590 mPileups for each sample and for SNPs of interest (related to viral titer), we counted the number of each  
591 nucleotide to confirm the estimated frequencies of these nucleotides at each position in each sample. To  
592 confirm that there are no coinfections of types, we also subsampled samples and randomly merged low and  
593 high type samples and again generated mPileup files, for SNPs of interest we again counted the number of  
594 each nucleotide at each position and confirmed these matched our expected counts in the merged files. We  
595 then compared these artificial coinfections to actual samples to confirm the presence or absence of  
596 coinfections, finding no samples consistent with coinfections. We then used SNPeff to identify the  
597 annotation of each SNP and label synonymous and non-synonymous (CINGOLANI *et al.* 2012). We extracted  
598 the synonymous site frequency spectrum to estimate the effective population size backwards in time using  
599 StairwayPlot (LIU AND FU 2015).

#### 600 *Identifying differentially expressed genes between DiNV infected and uninfected Drosophila innubila*

601 For 100 male *Drosophila innubila* collected in 2018 (indicated in Supplementary Table 2), we  
602 homogenized each fly separately in 100 $\mu$ L of PBS. We then split the sample homogenate in half, isolated  
603 DNA from half as described above and isolating RNA using the Direct-zol RNA Microprep protocol  
604 (R2061). Using the isolated DNA, we tested each sample for DiNV using PCR for *P47* as described

605 previously, using 40 DiNV infected samples and 40 uninfected samples. We then prepared a cDNA  
606 library for each of these 80 RNA samples using a modified version of the Nextera TruSeq library prep kit  
607 meant to conserve reagents and sequenced these samples on a NovaSeq NS6K SP 100SE (100bp single  
608 end). We also sequenced DNA for these samples, with DNA isolated and prepared as above, also  
609 sequenced on a NovaSeq NS6K SP 100SE (100bp single end). The DNA sequenced here was mapped as  
610 described above, with variation called as described above for other DNA samples.

611 Following trimming and filtering the data as described in the methods, we mapped all mRNA  
612 sequencing data to a database of rRNA (QUAST *et al.* 2013) to remove rRNA contaminants. Then we  
613 mapped the short read data to the masked *D. innubila* genome and DiNV genome using GSNAP (-N 1 -o  
614 sam) (WU AND NACU 2010). We estimated counts of reads uniquely mapped to *D. innubila* or DiNV  
615 genes using HTSEQ (ANDERS *et al.* 2015) for each sample. Using EdgeR (ROBINSON *et al.* 2009) we  
616 calculated the counts per million (CPM) of each gene in each sample and counted the number of samples  
617 with CPM > 1 for each gene. We find that over 70.3% of genes have a CPM > 1 in at least 70 samples.  
618 For the remaining genes, we find these genes are expressed in all samples of a subset of the strains (e.g.  
619 DiNV uninfected, DiNV infected, DiNV high infected, DiNV low infected). This supports the validity of  
620 the annotation of *D. innubila*, given most genes are expressed in some manner, and suggests our RNA  
621 sequencing samples show expression results consistent with the original annotation of the *D. innubila*  
622 genome.

623 We attempted to improve the annotation of the *D. innubila* genome to find genes expressed only  
624 under infection. We extracted reads that mapped to unannotated portions of the genome and combined these  
625 for uninfected samples, samples infected with high type DiNV and samples infected with low type DiNV  
626 as three separate samples. We then generated a *de novo* assembly for each of these three groups using  
627 Trinity and Velvet (SCHULZ *et al.* 2012; HAAS *et al.* 2013). We then remapped these assemblies to the  
628 genome to identify other transcripts and found the consensus of these two for each sample. Using the  
629 Cufflinks pipeline (GHOSH AND CHAN 2016), we mapped reads to the *D. innubila* genome and counted the  
630 number of reads mapping to each of these putative novel transcript regions, identifying 15,676 regions of  
631 at least 100bp, with at least 1 read mapping in at least 1 sample. Of these, 717 putative genic regions have  
632 at least 1 CPM in all 80 samples, or in all samples of one group (DiNV uninfected, DiNV infected, DiNV-  
633 low infected, DiNV-high infected). We next attempted to identify if any of these genes are differentially  
634 expressed between types, specifically between uninfected strains and DiNV infected strains, and between  
635 low-type infected and high-type infected strains. Using a matrix of CPM for each putative transcript region  
636 in each sample, we calculated the extent of differential expression between each type using EdgeR  
637 (ROBINSON *et al.* 2009), after removing regions that are under expressed, normalizing data and estimating  
638 the dispersion of expression. We find that 26 putative genes are differentially expressed between infected

639 and uninfected types, and 69 putative genes are differentially expressed between high and low types. We  
640 took these regions and identified any homology to *D. virilis* transcripts using blastn (ALTSCHUL *et al.* 1990).  
641 We find annotations for 37 putative genes are either expressed in all samples, or differentially expressed  
642 between samples. Of the 14 putative genes expressed in all samples, nine have the closest blast hit to an  
643 rRNA gene, and five have hits to unknown genes. For 23 differentially expressed putative genes with blast  
644 hits, 3 genes are like antimicrobial peptides (*IMI*, *IMI4*, *IM3*), these genes are significantly downregulated  
645 upon infection, like other Toll regulated AMPs, and have significantly lower expression in strains infected  
646 with high type DiNV compared to low types. The remaining 20 genes all have similarity to genes associated  
647 with cell cycle regulation, actin regulation and tumor suppression genes.

#### 648 *Identifying genes associated with viral titer in Drosophila innubila*

649 As the logarithm of viral titer was normally distributed (Shapiro-Wilk test  $W = 0.05413$ ,  $p$ -value = 0.342),  
650 we used PLINK (PURCELL *et al.* 2007) to associate nucleotide polymorphism to logarithm of viral titer in  
651 infected samples. We fit a linear model in PLINK including population, sex, *Wolbachia* presence, the date  
652 of collection and the relationship matrix for relationship of each sample (inferred using PLINK).

653 We first fit this model for all 5,283 viral polymorphisms, before performing the association study,  
654 we also pruned viral SNPs for both the total population and each subpopulation leaving 1,403 SNPs. For  
655 the total sample we identified associations between the logarithm of viral titer and the frequency of the viral  
656 polymorphism in each individual sample, resulting in the following model:

$$657 \quad \text{Log}_{10}(\text{viral titre}) \sim \text{SNP} + \text{hs} + \text{w} + \text{p} + \text{dc} + (\text{SNP} * \text{hs}) + (\text{SNP} * \text{p}) + (\text{SNP} * \text{w}) \\ 658 \quad \quad \quad + \text{relationship}[\text{strain}]$$

659 Where hs = host sex, p = location of collection, w = *Wolbachia* presence, dc = date collected  
660 Following model fitting, we found factors which seemed to show little or no effect on viral titre ( $p$ -value >  
661 0.1) using an ANOVA in R (TEAM 2013), and removed these, refitting the model. This was done step-wise,  
662 leaving the following model by the end:

$$663 \quad \text{Log}_{10}(\text{viral titre}) \sim \text{SNP} + \text{hs} + \text{p} + (\text{SNP} * \text{hs}) + \text{relationship}[\text{strain}]$$

664 Following this we also performed a GWAS using PLINK (PURCELL *et al.* 2007) in the host, using  
665 previously called host variation, and considering viral haplotype as an additional covariate.

$$666 \quad \text{Log}_{10}(\text{viral titre}) \sim \text{SNP} + \text{hs} + \text{p} + (\text{SNP} * \text{hs}) + \text{vh} + \text{relationship}[\text{strain}]$$

667 Where hs = host sex, p = location of collection, w = *Wolbachia* presence, dc = date collected, vh = viral  
668 haplotype. We found no convincing significant associations (Supplementary Figure 11).

669 We repeated this analysis for DiNV variants in *D. azteca* and *D. falleni* separately. We performed  
670 the GWAS twice, first using the original model, then including viral haplotype as an additional covariate.



671 *Estimating viral titre using qPCR*

672 Following the identification of the viral haplotype associated with viral titre we sought to determine the  
673 effect of viral haplotypes in actual infections. For 20 samples with fly homogenate, we determine the viral  
674 titer and haplotype following filtration with a 0.22 $\mu$ M filter.

675 We performed qPCR for the viral gene *p47* (Forward 5-TCGTGCCGCTAAGCATATAG-3,  
676 Reverse 5-AAAGCTACATCTGTGCGAGG-3) on 1  $\mu$ L of fly filtrate per sample and compared the  
677 estimated C<sub>q</sub> values across 3 replicates to estimated viral copy number to confirm viral concentration  
678 (protocol: 2 minutes at 95°C, 40 cycles of 95°C for 30 seconds and 59°C for 20 seconds, followed by 2  
679 minutes at 72°C). Following this we diluted samples to similar C<sub>q</sub> values, relative to the sample with the  
680 highest C<sub>q</sub> value. We confirmed this by repeating qPCR with *p47* primers of 1  $\mu$ L of each sample.

681 For each filtrate sample we performed infections on 30 *D. innubila* males 4-5 days following  
682 emergence using pricks with sterile needles dipped in viral filtrate. We recorded survival of each fly each  
683 day and removed dead flies. Finally, we took samples 1, 3 and 5-days post infection and measured viral  
684 copies of *p47* relative to *tpi* at each time point.

685 *Phylogeography of DiNV infection and the evolution of the different viral haplotypes*

686 For each DiNV infected *D. innubila* sample, we reconstructed the consensus DiNV genome infecting them  
687 using GATK AlternateReferenceMaker and the VCF generated for each strain (MCKENNA *et al.* 2010;  
688 DEPRISTO *et al.* 2011). We then converted these genomes into Phylip format and used BEAST2 to build  
689 the phylogeny of DiNV genomes using 100 million iterations with a burn in of 5 million (BOUCKAERT *et al.*  
690 *et al.* 2014). We considered phylogeography by providing the longitude and latitude of each samples  
691 collection. We then generated a final consensus phylogeny using Tracer with at least 90% majority  
692 consensus and removed trees that had not converged to the same joint density (BOUCKAERT *et al.* 2014).  
693 To reconstruct the evolution of the high type viral type we used APE (PARADIS *et al.* 2004) to infer the  
694 appearance order of the six perfectly linked SNPs on the phylogeny using the all different rates (ARD)  
695 discrete model (PARADIS *et al.* 2004). We also confirmed these recurrent mutations across the phylogeny  
696 using TreeTime to identify recurrently evolving SNPs (SAGULENKO *et al.* 2018). Finally, we also created  
697 a matrix of SNPs present in at least 2 viral samples and used this matrix in a principle component analysis  
698 in R (TEAM 2013), labelling each sample by their viral type in the PCA.

699 *Simulating the evolution of the high and low viral haplotypes.*

700 We sought to simulate the infection of DiNV in *D. innubila* when considering the evolution of a high titer  
701 viral haplotype, specifically if two viral types can be maintained against each other at stable frequencies,  
702 and if the high viral haplotype with 5 shared mutations could evolve recurrently in the given time period  
703 given realistic parameters. We used the R package DeSolve (SOETAERT *et al.* 2010) to simulate infection



704 dynamics in a modified SIR model. Specifically, we removed a resistant class, under the assumption that  
705 flies won't live long enough to shed the infection. Therefore, the proportion of population infected per  
706 generation is as follows:

$$707 \quad p_{Infected} = (Susceptible * Infected * \beta) - (Infected * \gamma)$$

708 Where  $\beta$  represents an infection parameter and  $\gamma$  represents a virulence parameter (e.g. the increased  
709 likelihood an infected individual has of dying before it can spread its infection). This equation can be  
710 rearranged to show the stabilized maximum frequency of infection:

$$711 \quad p_{Infected} = 1 - \frac{\gamma}{\beta}$$

712 Which is maintained while  $\gamma$  is greater than 0.01. The average frequency decreases as absolute transmission  
713 rate decreases past this point. We then extended this to include two competing infection types, to represent  
714 the two viral types, with the total proportion of population infected per generation as follows:

$$715 \quad p_{Susceptible} = 1 - (Susceptible * Infected_1 * \beta_1) - (Infected_1 * \gamma_1) \\ 716 \quad + (Susceptible * Infected_2 * \beta_2) - (Infected_2 * \gamma_2)$$

717 This equation can be rearranged as before to show the stabilized frequency of infection for two viral types:

$$718 \quad p_{Infected} = 1 - \frac{\gamma_1 + \gamma_2}{\beta_1 + \beta_2}$$

719 In this case, the two viral haplotypes can both be maintained within a population when the ratio of infection  
720 to virulence are the same:

$$721 \quad \frac{\gamma_1}{\beta_1} = \frac{\gamma_2}{\beta_2}$$

722 We assessed how starting frequency and difference in  $\gamma$  and  $\beta$  affects the evolution of each type and their  
723 stable frequencies but repeating these simulations for 10,000 generations for each set of parameters. We  
724 repeated simulations with transmission rates varying between 0.00001 and 1, and virulence rates set as the  
725 transmission rate, divided by a scaling factor between 0.01 and 10 (to vary virulence at multiple rates higher  
726 and lower than transmission rate), with all pairwise combinations across all parameters.

727 Next, we attempted to assess if the 'high titer' viral haplotype could possibly evolve recurrently in  
728 each population in the time scale seen in our findings. We again used the modified SIR model, this time  
729 discrete with population sizes set to 1 million individuals, based on *StairwayPlot* estimates (LIU AND FU  
730 2015). For each infected individual in the population, we tracked the viral titer and also recorded the  
731 presence of absence of five mutations, with each mutation increasing the titer of infection, but each further  
732 mutation having successively smaller increases in viral titer ( $titer^{\sqrt{no.muts}}$ ), representing the epistatic  
733 interaction of high titer associated mutations seen in the viral haplotype. We multiplied the infection  
734 parameter, mutation parameter and virulence parameter by viral titer, under the assumption that viral titer  
735 increases both infection and death rate, and the mutation rate is per viral particle. We considered a per site

736 mutation rate of  $10^{-6}$ , based on estimated baculovirus mutation rate (ROHRMANN 2013; CHATEIGNER *et al.*  
737 2015), with a specific mutation rate for the five haplotype mutations of  $6.4e-12$  ( $1e-6/155kbp$ ) \* viral titer.  
738 We then simulated populations in replicate 1000 times for 100,000 generations with a starting infection  
739 frequency of 10% for the ‘low titer’ haplotype, recording the frequency of the virus in a population, the  
740 frequency of the haplotype and the time that each ‘high titer’ mutation reaches high enough frequency to  
741 escape stochastic behavior and behave deterministically under selection (GILLESPIE 2004).

742 To estimate the possible selection coefficient for DiNV in the CH population, we assumed an  
743 exponential distribution and 5 viral generations per year (80 generations between 2001 and 2017). We then  
744 solved the following equation:

$$745 \quad P_{2017} = P_{2001} * (1 + s)^t$$

746 Where  $P_{2017}$  = the frequency of the High type among viral samples in 2017 (71%),  $P_{2001}$  = the frequency of  
747 the High type among viral samples in 2001 (39%),  $s$  = the selection coefficient and  $t$  = the number of  
748 generations (80). We then used this estimated selection coefficient in the same equation to find the number  
749 of generations ( $t$ ) to go from  $1/2N_e s$  (0.0000714, assuming an  $N_e$  of 1000000) to fixation (0.99):

$$750 \quad 0.99 = 0.0000714 * (1 + 0.007)^t$$

#### 751 *Experimental infections of Drosophila innubila with DiNV*

752 We chose *D. innubila* samples infected with DiNV and with sequenced genomes, 4 infected with the high  
753 type DiNV and 4 infected with the low type. For these samples we estimated their viral copy number per  
754 host genome as described previously. We used qPCR on *p47* and *tpi* to find the differences in Cq values to  
755 calculate the concentration of each sample relative to the lowest concentration sample and diluted 50 $\mu$ L of  
756 filtrate for each sample to match the concentration of each sample to the samples with the lowest titer  
757 (IPR07). For a separate 50 $\mu$ L of the IPR01 sample, we performed 1 in 10 serial dilutions to give 45 $\mu$ L of  
758 filtrate at full concentration, 1 in 10 concentration, 1 in 100 concentration and 1 in 1000 concentration.  
759 Using these sets of samples (matched titer and serial dilutions) we next performed experimental infections.

760 We transferred 50 *D. innubila* (of roughly equal sex ratio) to new food and let them lay eggs for 1  
761 week, following this we collected male offspring aged 2-5 days for experimental infections.

762 Across 4 separate days in the mornings (between 9am and 11am), we infected the collected male  
763 flies with each sample. For flies in batches of 10, we performed pricks with microneedles dipped in the  
764 prepared viral filtrate. For each day we also had 2 control replicates of 10 flies pricked with microneedles  
765 dipped in sterile media. Following infections, we checked on each vial of 10 flies one-hour post infection  
766 and removed dead flies (likely killed by the needle instead of the virus). We also checked each vial each  
767 morning for 15 days, removing dead flies (freezing to determine the viral titer), and flipping flies to new

768 food every 3-4 days. Checking at 10am each day, we recorded the day that each fly died, what filtrate they  
769 had been infected with, and what replicate/infection day set they belonged to. We next looked for  
770 differences in survival over time compared to sterile wound controls using a Fit proportional hazards  
771 regression model in R (TEAM 2013; KASSAMBARA *et al.* 2017), considering titer, infection sample and  
772 replicate as co-variates (day of death ~ [titer or strain] + infection date).

773 For a second set of experimental infections (performed as described above, stabbed with diluted  
774 filtrate from different strains), we also removed 3 living flies 1 hour, 1 day and 5 days post infection. Using  
775 qPCR, we found the difference in *p47* log-Cq and *tpi* log-Cq to estimate the viral copy number for each  
776 sample over time.

### 777 **Acknowledgements**

778 This work was completed with helpful discussion from Justin Blumenstiel, Joanne Chapman, John Kelly,  
779 Stuart MacDonald, Andrew Mongue and Carolyn Wessinger. We would especially like to thank Maria  
780 Orive, Kelly Dyer and Paul Ginsberg for helpful feedback in the writing of the manuscript and framing of  
781 the discussion. Collections were completed with assistance from Todd Schlenke, Paul Ginsberg, Kelly Dyer,  
782 Brandon Cooper, John Jaenike and the Southwest Research Station. We thank Brittny Smith and Jenny  
783 Hackett at the KU CMADP Genome Sequencing Core (NIH Grant P20 GM103638) and K-INBRE  
784 Bioinformatics Core for assistance in genome isolation, library preparation, sequencing and computational  
785 resources. This work was supported by a K-INBRE postdoctoral grant to TH (NIH Grant P20 GM103418).  
786 This work was also funded by NIH Grants R00 GM114714 and R01 AI139154 to RLU. *D. falleni* collection  
787 was funded by NSF grant DEB-1737824.

788 **Supplementary Figures**

789 **Supplementary Figure 1:** McDonald-Kreitman based statistics for each gene in population of *Drosophila*  
790 *innubila* Nudivirus, with viral envelope and GrBNV potential virulence factors shown separately. DoS =  
791 direction of selection, Selection Effect = SnIPRE estimated weighted DoS. Boxplots marked with a \* are  
792 significantly higher than background/other viral genes (GLM  $p$ -value < 0.05).

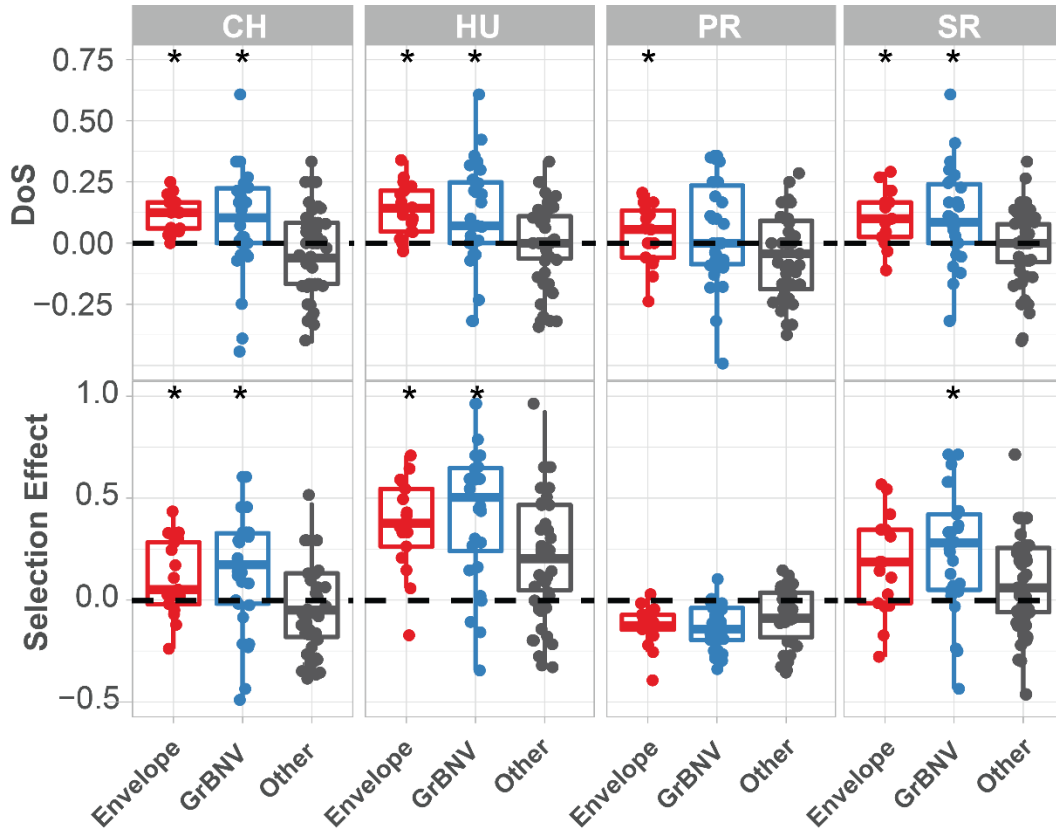

793

794 **Supplementary Figure 2:** Frequency of each significant SNP within each sample, ranked by the viral titer  
795 in each sample (left = lowest, right = highest), to show the strong linkage of SNPs and little evidence of co-  
796 infection, also highlights the association between SNP frequency and Helicase-2.

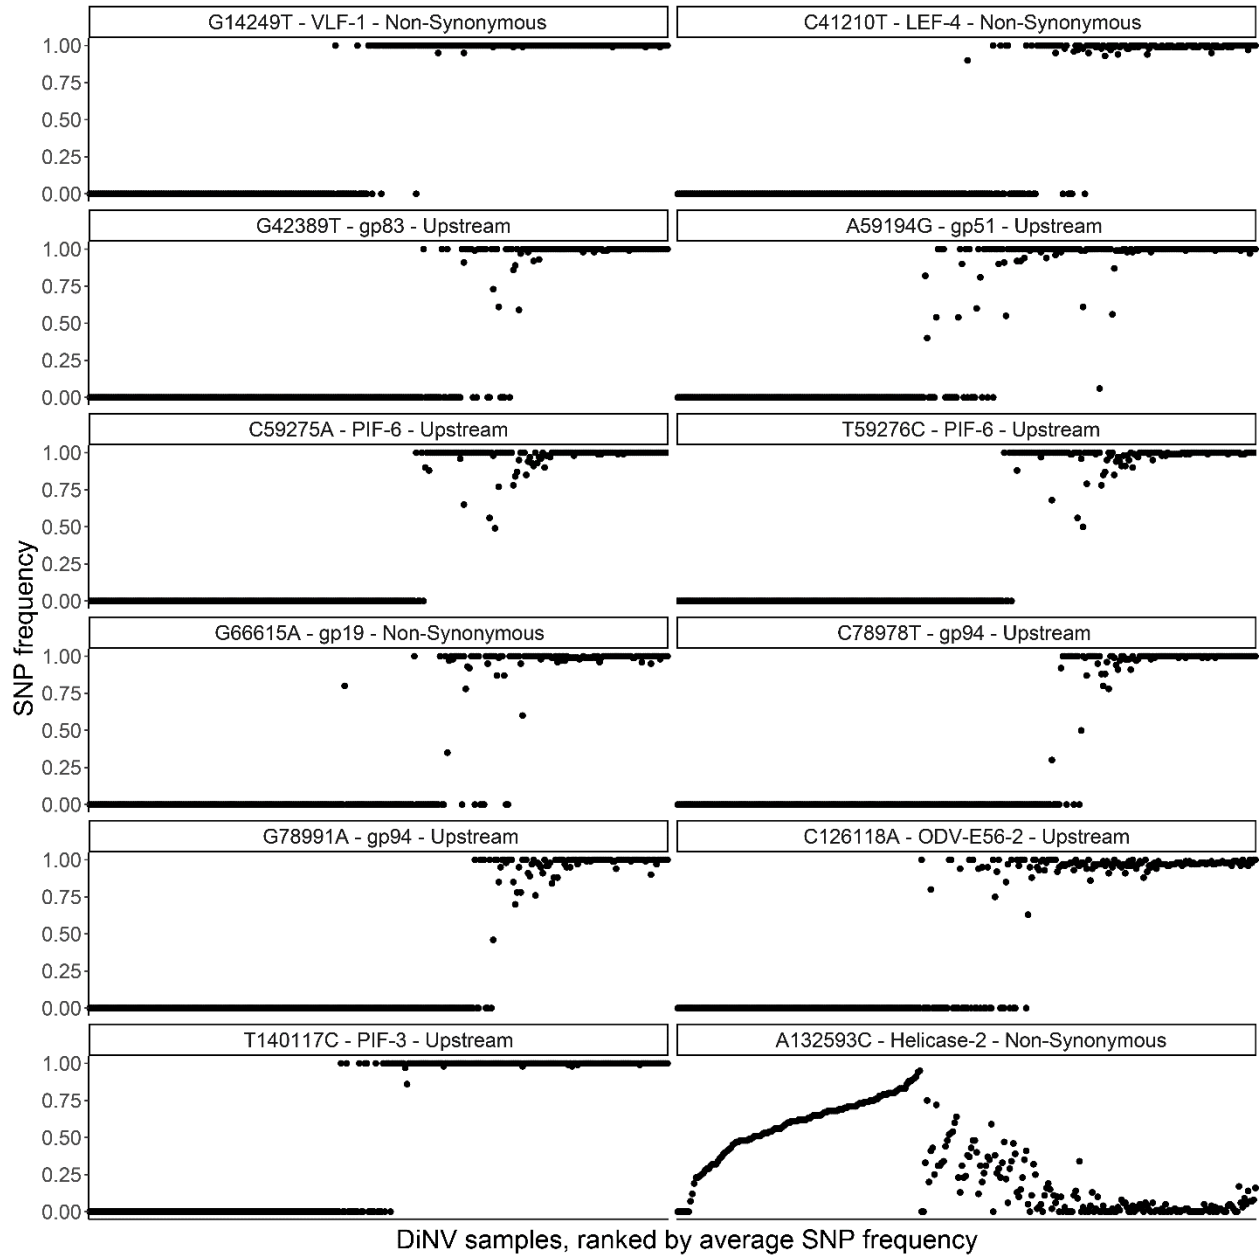

798 **Supplementary Figure 3:** Linkage disequilibrium between SNPs in DiNV. The labelled SNPs  
799 (significant SNPs found in the GWAS) are strongly linked. Points are colored by the estimated linkage  
800 between SNPs, from red ( $r^2 = 1$ ) to white ( $r^2 = 0$ )

### Pairwise LD

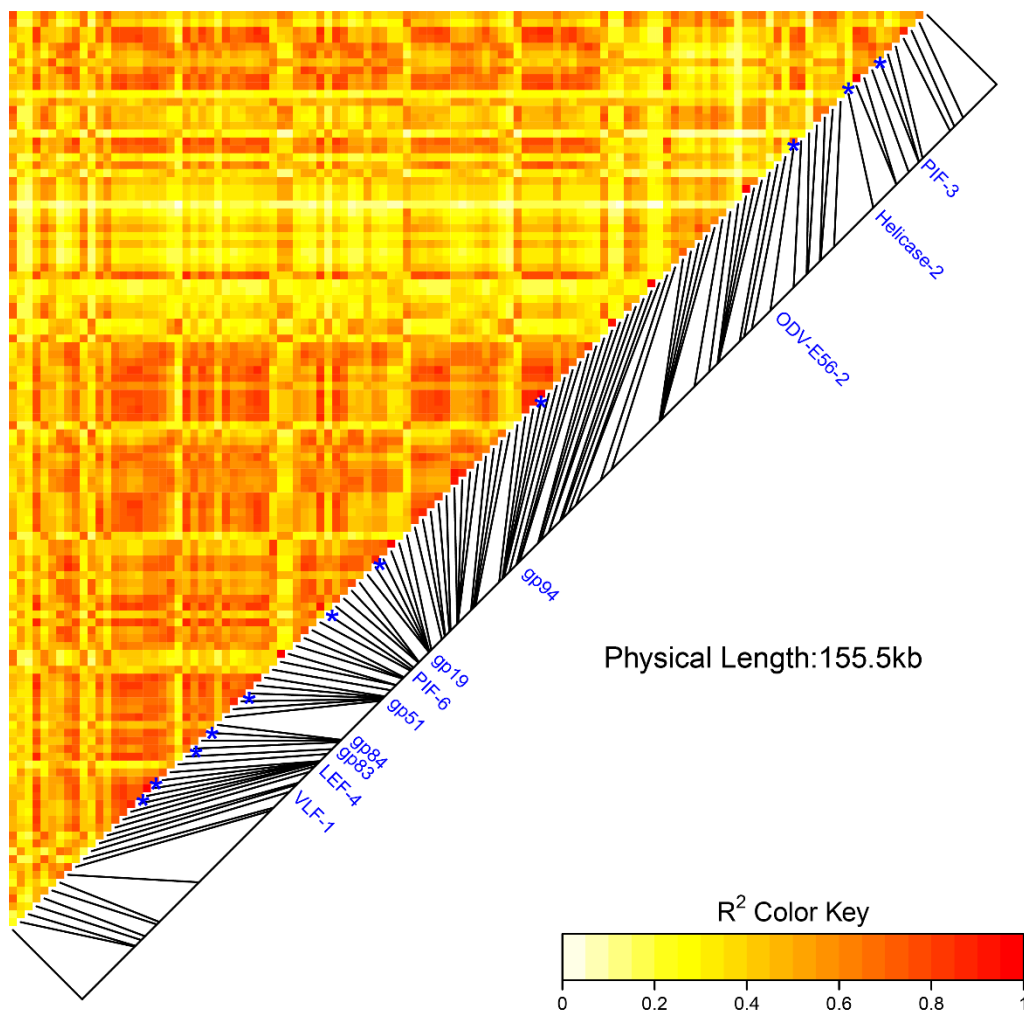

801



802 **Supplementary Figure 4:** Linkage ( $r^2$ ) between different types of SNPs in each population of DiNV, and  
803 across all samples. Other = SNPs which are not significantly associated with DiNV titer and do not form  
804 the viral haplotype. Sig = SNPs which are significantly associated with DiNV titer and do not form the  
805 viral haplotype. BG = SNPs which are in the background which the viral haplotype evolved on in each  
806 population.

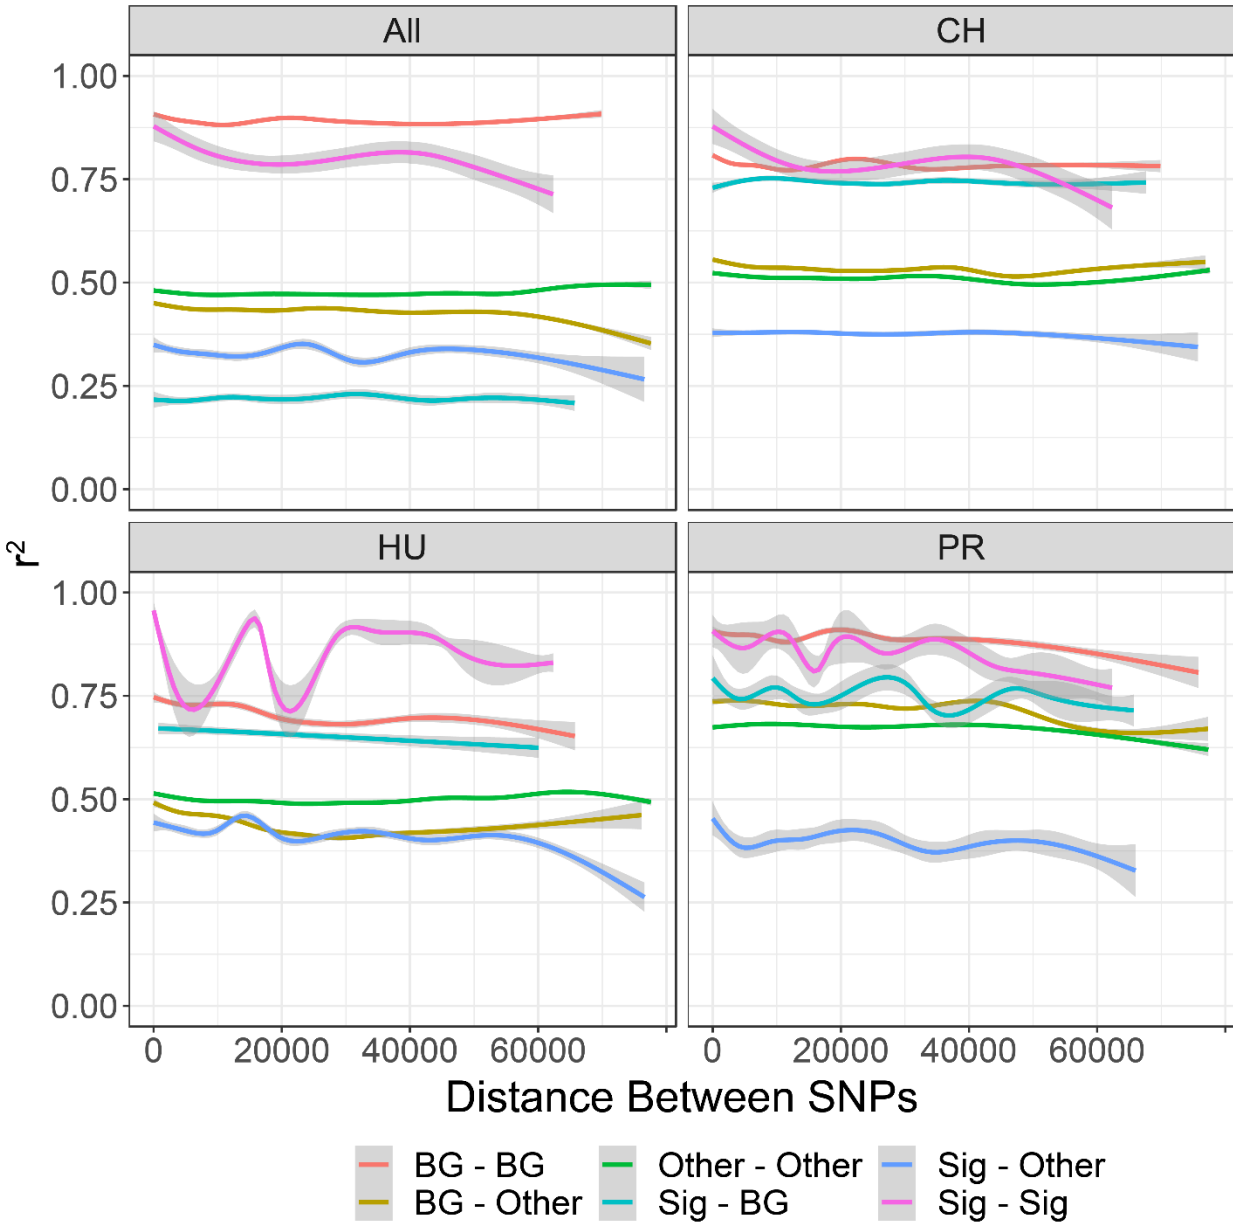

808 **Supplementary Figure 5:** Volcano plot of changes in gene expression between *D. innubila* infected with  
 809 DiNV and uninfected controls. Gene categories of interest, such as enriched categories, are highlighted in  
 810 color. The FDR-correct significance cut-off of 0.01 (10,320 tests) is shown as a dashed line. **B.** Comparison  
 811 of gene expression changes upon infection for *D. innubila* and *D. melanogaster*. Significantly differentially  
 812 expressed genes ( $p$ -value < 0.01, FDR-corrected) are colored, genes differentially expressed in both species  
 813 are colored blue, genes differentially expressed in just *D. melanogaster* are colored yellow and genes  
 814 differentially expressed in just *D. innubila* are colored red.

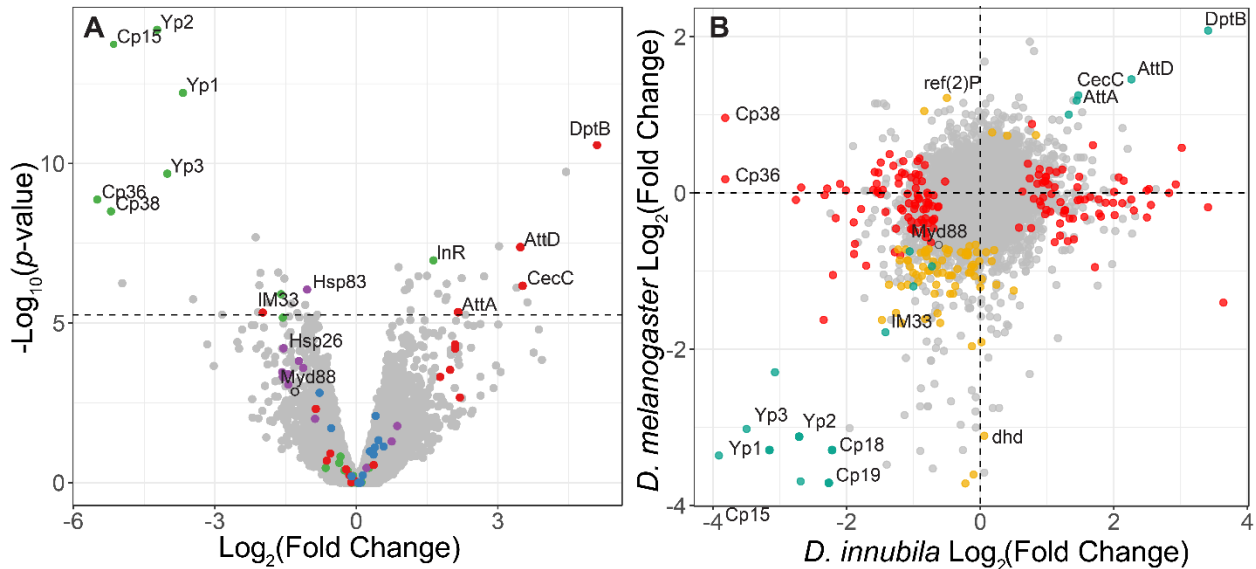

815 **Legend:** AMP (red), Antiviral RNAi (blue), Chorion (green), HSP (purple), Background (grey), **Significance:** None (grey), *D. innubila* (red), *D. melanogaster* (yellow), Both (blue)

816 **Supplementary Figure 6:** Expression changes (shown as transcript fragments per 1 million reads per 1kbp  
817 of exon) of antimicrobial peptides between strains infected with high type DiNV, low type DiNV or not  
818 infected. Black stars above low samples show significant differential expression between DiNV infected  
819 strains and uninfected strains (multiple testing corrected  $p$ -value  $< 0.05$ ). Red stars above high samples  
820 show significant differential expression between low type infected strains and high type infected strains  
821 (multiple testing corrected  $p$ -value  $< 0.05$ ).

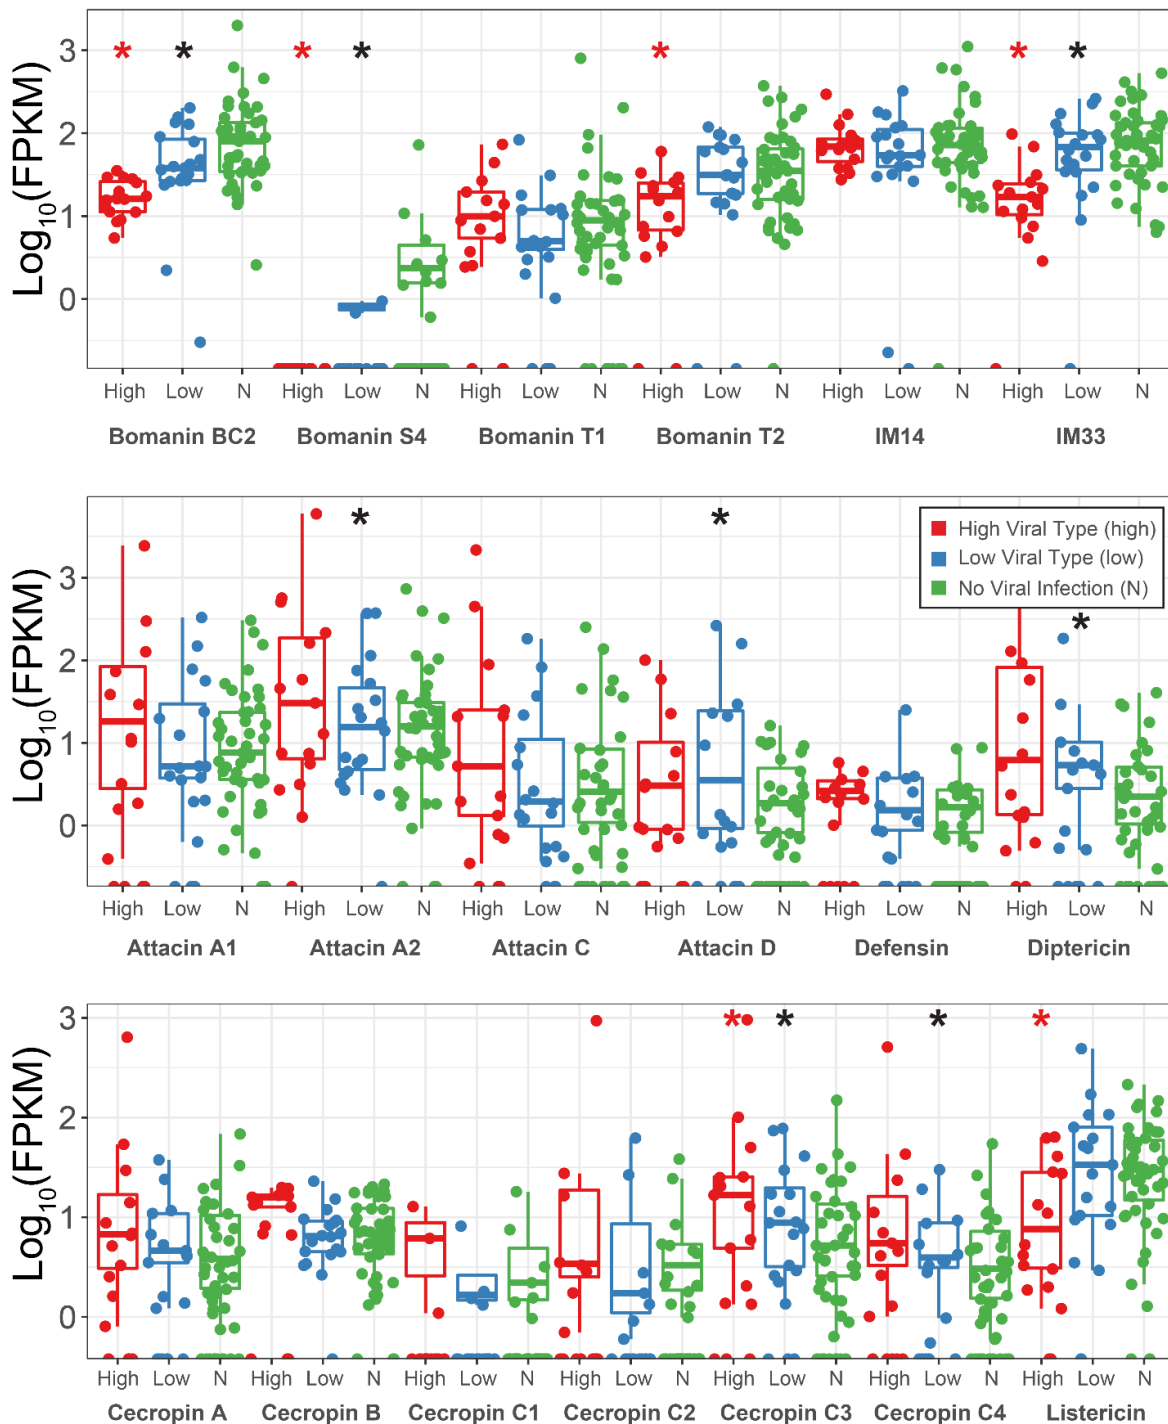

822

823 **Supplementary Figure 7:** Effect of differences in viral type and titer in experimental infections. **A.**  
824 Survival curves of *D. innubila* infected with DiNV filtrate of different dilutions compared to control flies  
825 pricked with sterile media, for 15 days post infection. **B.** qPCR copy number of viral *p47* relative to *tpi* in  
826 samples of *D. innubila* infected with DiNV filtrate of different dilutions, between 1 and 1000 viral particles  
827 per host genome copy.

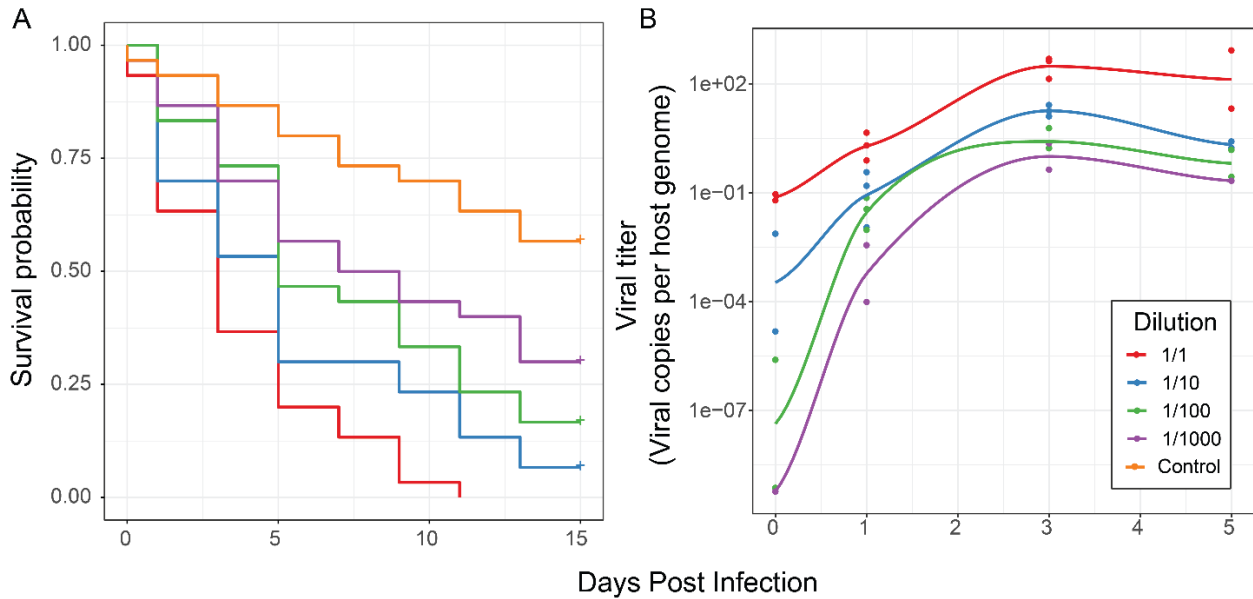

828

829 **Supplementary Figure 8 A:** Survival of *D. innubila* reference strain 5 days post infection, using filtrate  
 830 from different samples versus uninfected control, colored by high type virus or low type virus. **B.** Survival  
 831 of *D. innubila* reference strain 5 days post infection using serial dilutions of IPR01 filtrate versus control.  
 832 **C.** Viral titer estimated per viral genotype at 5 days post-infection, colored by high type virus or low type  
 833 virus. **D.** Viral titer of DiNV infecting *D. innubila* reference strain 5 days post infection using serial  
 834 dilutions of IPR01 filtrate versus control.

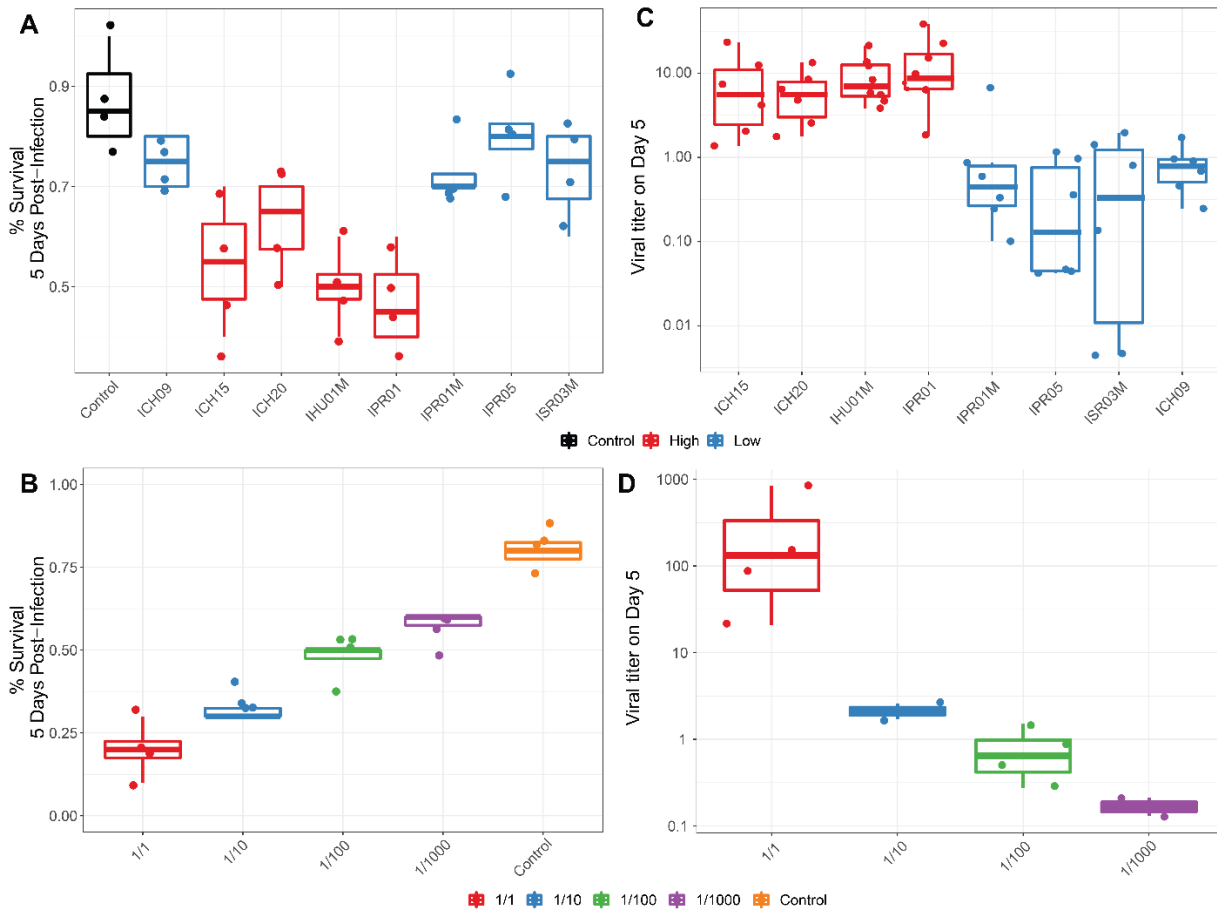

835

836 **Supplementary Figure 9. A.** Frequency of samples with different numbers of SNPs in the viral  
837 haplotype, there are very few intermediate types. **B.** Frequency of each SNP in samples infected with the  
838 virus, showing there is little evidence of co-infections. **C.** Principle component analysis of DiNV strains  
839 using variation of strains. Strains are colored by the viral type, showing its recurrent evolution. Point  
840 shape denotes species in which DiNV was found (*D. azteca*, *D. falleni* or *D. innubila*). Strains cluster by  
841 collection location. **D.** Linkage between SNPs in the viral haplotype ( $r^2$ ) and other SNPs in the haplotype,  
842 to other SNPs in the viral genome.

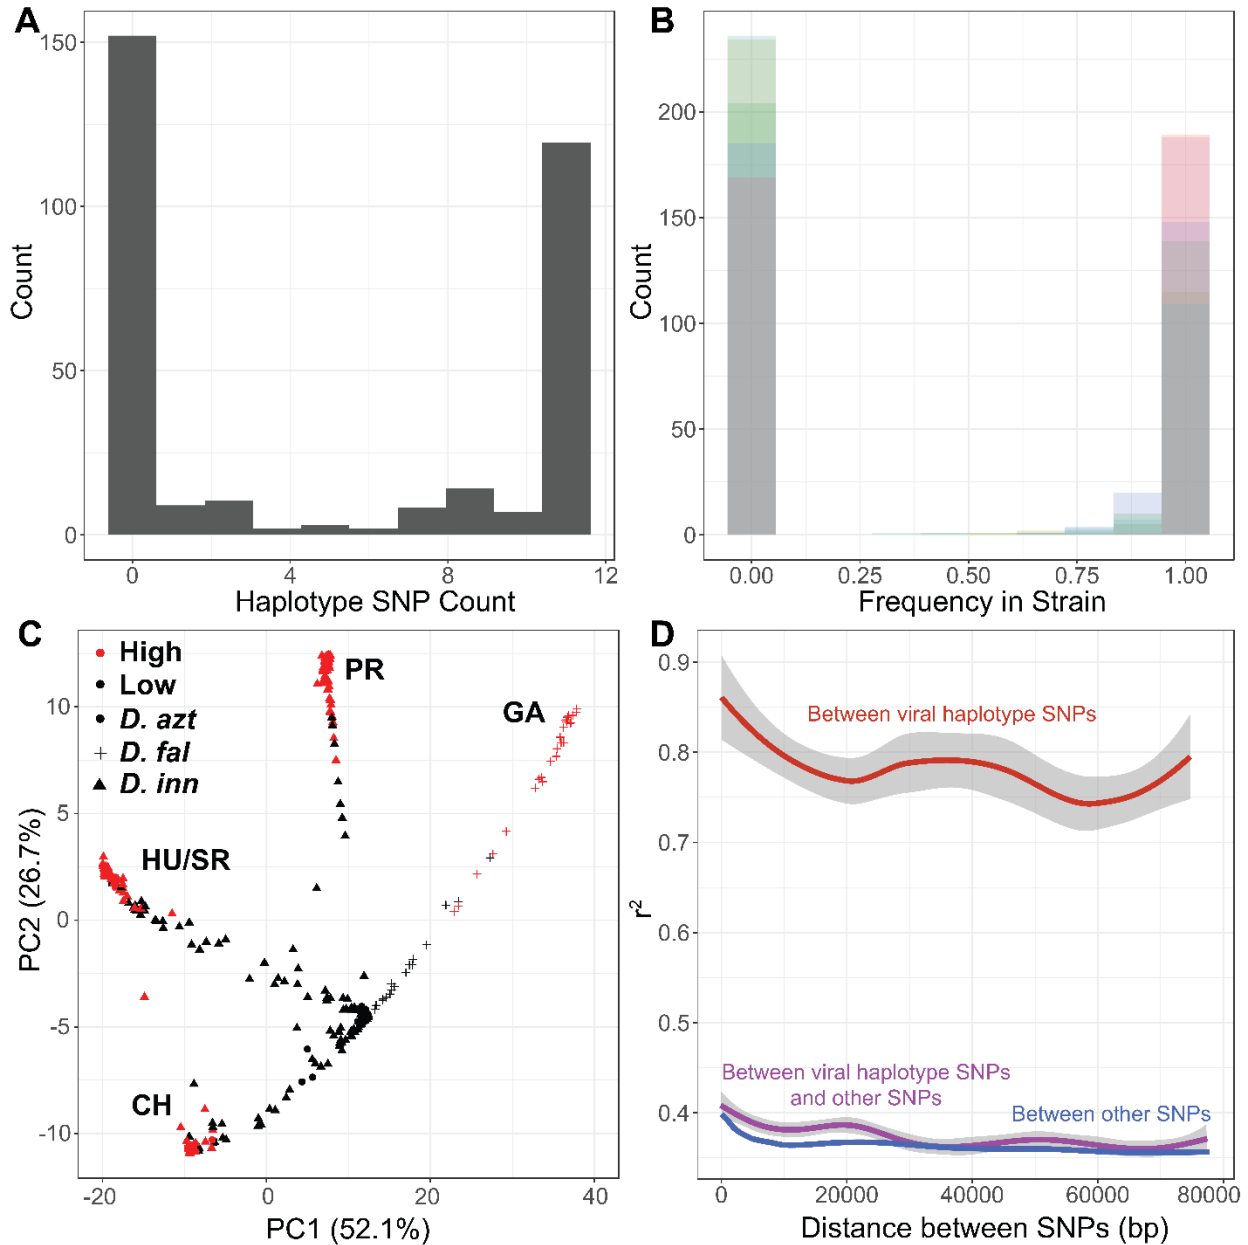

843



844 **Supplementary Figure 10. A:** Manhattan plot of significance of SNP on viral titer after factoring in  
845 interaction with the viral haplotype. The significance cut offs are labelled ( $p$ -value < 0.05 after multiple  
846 testing correction dotted,  $p$ -value < 0.05 after permutations dashed). **B:** Manhattan plot of SNP x viral  
847 haplotype interaction for viral titer GWAS in *D. innubila*, calculated using *PLINK*. The significance cut  
848 offs are labelled ( $p$ -value < 0.05 after multiple testing correction dotted,  $p$ -value < 0.05 after permutations  
849 dashed). **C:** Manhattan plot of SNP x sex interaction for viral titer GWAS in *D. innubila*, calculated using  
850 *PLINK*.

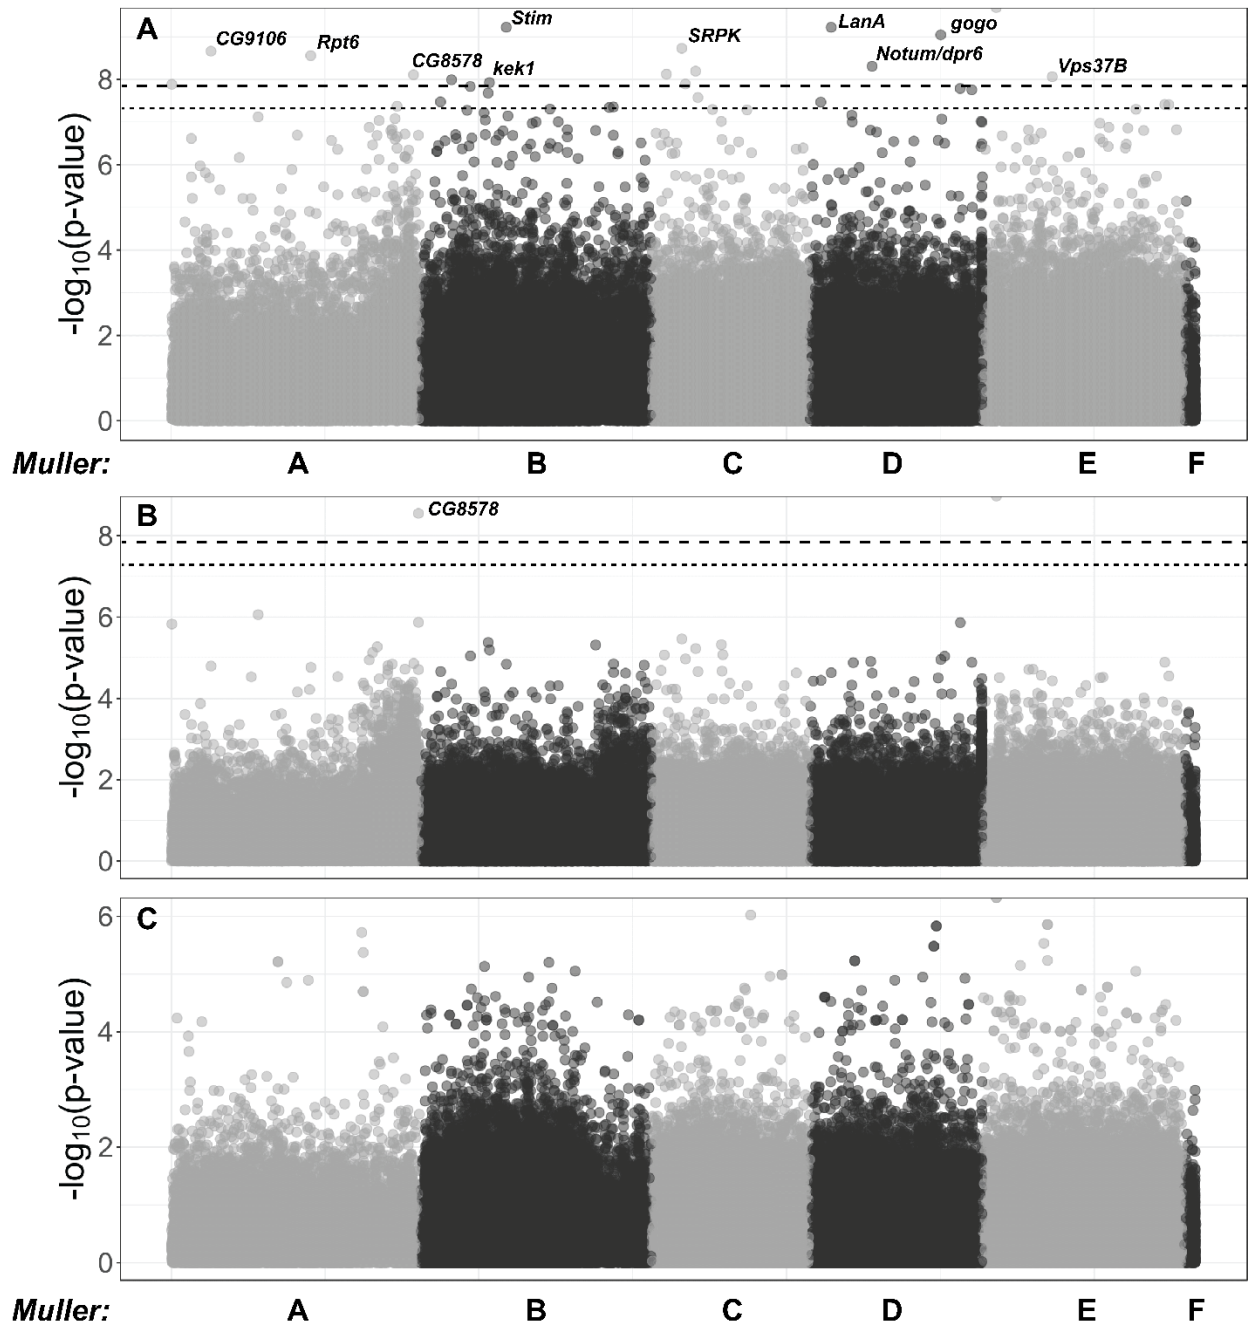

851

852 **Supplementary Figure 11:** Effective population size backwards for each population of DiNV going  
853 backwards in time, estimated using StairwayPlot. Dotted lines indicate the error windows for  $N_e$  at a given  
854 time point. Lines are colored by population.

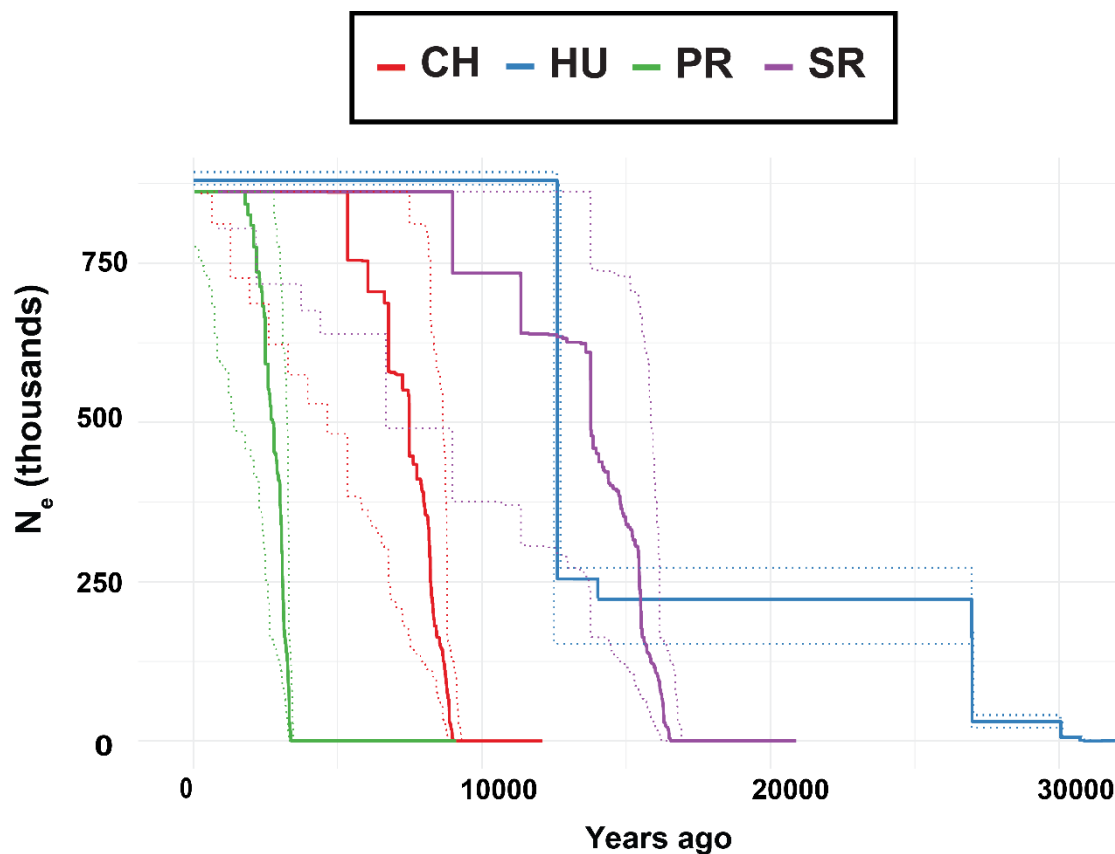

855

#### 856 **Supplementary Tables**

857 **Supplementary Table 1:** Summary of *Drosophila innubila* and *D. azteca* fly samples collected and  
858 sequenced for this study, table includes summary of coverage for X chromosome, , Muller B, other  
859 autosomes, virus and *Wolbachia*. Also contains SRA accessions for each strain.

860 **Supplementary Table 2:** Summary of *Drosophila innubila* fly RNA and DNA collected and sequenced  
861 for this study, including if infected with DiNV.

#### 862 **Supplementary Data**

863 **Supplementary Data 1:** FPKM of each gene in each sample across the whole *D. innubila* genome,  
864 formatted for use in fitting a generalized linear model. Table include the gene name, gene flybase  
865 annotation, *D. innubila* name, if the strains is infected with DiNV and the FPKM.

866 **Supplementary Data 2:** FPKM of each gene in each sample across the whole *D. innubila* genome,  
867 formatted for differential gene expression analysis. Table include the gene name, gene flybase annotation,  
868 *D. innubila* name, if the strains is infected with DiNV and the FPKM.

869 **Supplementary Data 3:** Differential gene expression analysis results between viral infected and  
870 uninfected strains for both *D. innubila* and *D. melanogaster*. Genes are labelled as if differentially  
871 expressed in one of the two species, or if differentially expressed in both.  
872 **Supplementary Data 4:** VCF file for SNPs in DiNV, used in estimation of population genetic statistics  
873 and in GWAS using PLINK.  
874 **Supplementary Data 5:** VCF file for SNPs in *D. innubila*, used in estimation of population genetic  
875 statistics and in GWAS.  
876 **Supplementary Data 6:** Population genetic statistics calculated for each gene in *D. innubila* using  
877 VCFtools for each population.  
878 **Supplementary Data 7:** McDonald-Kreitman statistics calculated for each gene in *D. innubila* using  
879 VCFtools for each population.  
880 **Supplementary Data 8:** Population genetic statistics calculated for each gene in DiNV using VCFtools  
881 for each population.  
882 **Supplementary Data 9:** McDonald-Kreitman statistics calculated for each gene in DiNV using VCFtools  
883 for each population.

## 884 **References**

885 Afonso, C. L., E. R. Tulman, Z. Lu, C. a. Balinsky, B. a. Moser *et al.*, 2001 Genome sequence of a  
886 baculovirus pathogenic for *Culex nigripalpus*. *Journal of virology* 75: 11157-11165.  
887 Alizon, S., and M. van Baalen, 2008 Transmission-virulence trade-offs in vector-borne diseases. *Theor*  
888 *Popul Biol* 74: 6-15.  
889 Altschul, S. F., W. Gish, W. Miller, E. W. Myers and D. J. Lipman, 1990 Basic local alignment search tool.  
890 *Journal of Molecular Biology* 215: 403-410.  
891 Anders, S., P. T. Pyl and W. Huber, 2015 HTSeq-A Python framework to work with high-throughput  
892 sequencing data. *Bioinformatics* 31: 166-169.  
893 Anderson, R. M., and R. M. May, 1982 Coevolution of hosts and parasites. *Parasitology* 85: 411-426.  
894 Argaud, O., L. Croizier, M. López-Ferber and G. Croizier, 1998 Two key mutations in the host-range  
895 specificity domain of the p143 gene of Autographa californica nucleopolyhedrovirus are required  
896 to kill *Bombyx mori* larvae. *Journal of General Virology* 79: 931-935.  
897 Blissard, G. W., and G. F. Rohrmann, 1990 Baculovirus diversity and molecular biology. *Annual Review*  
898 *of Entomology* 35: 127-155.  
899 Bouckaert, R., J. Heled, D. Kühnert, T. Vaughan, C. H. Wu *et al.*, 2014 BEAST 2: A Software Platform  
900 for Bayesian Evolutionary Analysis. *PLoS Computational Biology* 10: 1-6.  
901 Buffalo, V., 2018 *Scythe*.  
902 Burgyan, J., and Z. Havelda, 2011 Viral suppressors of RNA silencing. *Trends Plant Sci* 16: 265-272.  
903 Chateigner, A., A. Bezier, C. Labrousse, D. Jiolle, V. Barbe *et al.*, 2015 Ultra deep sequencing of a  
904 baculovirus population reveals widespread genomic variations. *Viruses* 7: 3625-3646.  
905 Cingolani, P., A. Platts, L. L. Wang, M. Coon, T. Nguyen *et al.*, 2012 A program for annotating and  
906 predicting the effects of single nucleotide polymorphisms, SnpEff: SNPs in the genome of  
907 *Drosophila melanogaster* strain w1118; iso-2; iso-3. *Fly* 6: 80-92.  
908 Coccia, E. M., M. Severa, E. Giacomini, D. Monneron, M. E. Remoli *et al.*, 2004 Viral infection and Toll-  
909 like receptor agonists induce a differential expression of type I and lambda interferons in human  
910 plasmacytoid and monocyte-derived dendritic cells. *European journal of immunology* 34: 796-805.

- 911 Costa, A., E. Jan, P. Sarnow and D. Schneider, 2009 The IMD pathway is involved in antiviral immune  
912 responses in *Drosophila*. PLoS ONE 4.
- 913 Croizier, G., L. Croizier, O. Argaud and D. Poudevigne, 1994 Extension of *Autographa californica* nuclear  
914 polyhedrosis virus host range by interspecific replacement of a short DNA sequence in the p143  
915 helicase gene. Proceedings of the National Academy of Sciences of the United States of America  
916 91: 48-52.
- 917 Daugherty, M. D., and H. S. Malik, 2012 Rules of engagement: molecular insights from host-virus arms  
918 races. Annual review of genetics 46: 677-700.
- 919 Davey, N. E., G. Trave and T. J. Gibson, 2011 How viruses hijack cell regulation. Trends Biochem Sci 36:  
920 159-169.
- 921 Dawkins, R., and J. R. Krebs, 1979 Arms Races between and within Species. Proceedings of the Royal  
922 Society of London B: Biological Sciences 205: 489-511.
- 923 DePristo, M. A., E. Banks, R. Poplin, K. V. Garimella, J. R. Maguire *et al.*, 2011 A framework for variation  
924 discovery and genotyping using next-generation DNA sequencing data. Nature genetics 43: 491-  
925 498.
- 926 Dobzhansky, T., 1937 Genetics and the origin of species. 364.
- 927 Dolan, P. T., Z. J. Whitfield and R. Andino, 2018 Mechanisms and Concepts in RNA Virus Population  
928 Dynamics and Evolution. Annual Review of Virology 5: 69-92.
- 929 Dyer, K. a., and J. Jaenike, 2005 Evolutionary dynamics of a spatially structured host-parasite association:  
930 *Drosophila innubila* and male-killing *Wolbachia*. Evolution; international journal of organic  
931 evolution 59: 1518-1528.
- 932 Eilertson, K. E., J. G. Booth and C. D. Bustamante, 2012 SnIPRE: Selection Inference Using a Poisson  
933 Random Effects Model. PLoS Computational Biology 8.
- 934 Enard, D., L. Cai, C. Gwennap and D. A. Petrov, 2016 Viruses are a dominant driver of protein adaptation  
935 in mammals. eLife 5: 1-25.
- 936 Feder, A. F., P. S. Pennings, J. Hermisson and D. A. Petrov, 2019 Evolutionary Dynamics in Structured  
937 Populations Under Strong Population Genetic Forces. G3 (Bethesda) 9: 3395-3407.
- 938 Ferreira, Á. G., H. Naylor, S. S. Esteves, I. S. Pais, N. E. Martins *et al.*, 2014 The Toll-Dorsal Pathway Is  
939 Required for Resistance to Viral Oral Infection in *Drosophila*. PLoS Pathogens 10.
- 940 Gavrillets, S., 2003 Perspective: models of speciation: what have we learned in 40 years? Evolution;  
941 international journal of organic evolution 57: 2197-2215.
- 942 Gavrillets, S., 2004 Fitness Landscapes and the Origin of Species. 117-147.
- 943 Ghosh, S., and C. K. Chan, 2016 Analysis of RNA-Seq Data Using TopHat and Cufflinks. Methods Mol  
944 Biol 1374: 339-361.
- 945 Gifford, R. J., 2012 Viral evolution in deep time: lentiviruses and mammals. Trends Genet 28: 89-100.
- 946 Gillespie, J., 2004 Population Genetics: A Concise Guide. 232.
- 947 Haas, B. J., A. Papanicolaou, M. Yassour, M. Grabherr, P. D. Blood *et al.*, 2013 De novo transcript sequence  
948 reconstruction from RNA-seq using the Trinity platform for reference generation and analysis.  
949 Nature protocols 8: 1494-1512.
- 950 Hermisson, J., and P. S. Pennings, 2005 Soft sweeps: molecular population genetics of adaptation from  
951 standing genetic variation. Genetics 169: 2335-2352.
- 952 Hill, T., B. Koseva and R. L. Unckless, 2019 The genome of *Drosophila innubila* reveals lineage-specific  
953 patterns of selection in immune genes. Molecular Biology and Evolution: 1-36.
- 954 Hill, T., and R. Unckless, 2020 Selection and demography shape genomic variation in a ‘Sky Island’ species  
955 Biorxiv: 1-35.
- 956 Hill, T., and R. L. Unckless, 2017 Baculovirus molecular evolution via gene turnover and recurrent positive  
957 selection of key genes. Journal of Virology 91: e01319-01317.
- 958 Hill, T., and R. L. Unckless, 2018 The dynamic evolution of *Drosophila innubila* Nudivirus. Infection,  
959 Genetics and Evolution: 1-25.
- 960 Hoffmann, J. A., 2003 The immune response of *Drosophila*. Nature 426: 33-38.
- 961 Holmes, E. C., 2007 Viral evolution in the genomic age. PLoS Biol 5: e278.

- 962 [Http://broadinstitute.github.io/picard](http://broadinstitute.github.io/picard), *Picard*.  
963 Hultmark, D., 2003 *Drosophila* immunity: Paths and patterns. *Current Opinion in Immunology* 15: 12-19.  
964 Jackson, T., 2009 The Use of Oryctes Virus for Control of Rhinoceros Beetle in the Pacific Islands, pp.  
965 133-140 in *Use of Microbes for Control and Eradication of Invasive Arthropods SE - 8*, edited by  
966 A. Hajek, T. Glare and M. O'Callaghan. Springer Netherlands.  
967 Jackson, T. A., A. M. Crawford and T. R. Glare, 2005 Oryctes virus - Time for a new look at a useful  
968 biocontrol agent. *Journal of Invertebrate Pathology* 89: 91-94.  
969 Joshi, N., and J. Fass, 2011 Sickle: A sliding window, adaptive, quality-based trimming tool for fastQ files.  
970 1.33.  
971 Kaltz, O., and J. A. Shykoff, 1998 Local adaptation in host-parasite systems. *Heredity* 81: 361-370.  
972 Kassambara, A., M. Kosinski and P. Biecek, 2017 survminer: Drawing Survival Curves using 'ggplot2'. R  
973 package version 0.3 1.  
974 Kelly, D. C., 1982 Baculovirus Replication. *Journal of General Virology* 63: 1-13.  
975 Kondrashov, A. S., S. Sunyaev and F. A. Kondrashov, 2002 Dobzhansky-Muller incompatibilities in  
976 protein evolution. *PNAS* 99: 14878-14883.  
977 Lamiable, O., C. Kellenberger, C. Kemp, L. Troxler, N. Pelte *et al.*, 2016 Cytokine Diedel and a viral  
978 homologue suppress the IMD pathway in *Drosophila*. *Proceedings of the National Academy of*  
979 *Sciences* 113: 698-703.  
980 Li, H., and R. Durbin, 2009 Fast and accurate short read alignment with Burrows-Wheeler transform.  
981 *Bioinformatics (Oxford, England)* 25: 1754-1760.  
982 Li, H., B. Handsaker, A. Wysoker, T. Fennell, J. Ruan *et al.*, 2009 The sequence alignment/map format and  
983 SAMtools. *Bioinformatics (Oxford, England)* 25: 2078-2079.  
984 Lipsitch, M., S. Siller and M. Nowak, 1996 The evolution of virulence in pathogens with vertical and  
985 horizontal transmission. *Evolution* 50: 1729-1741.  
986 Liu, X., and Y.-X. Fu, 2015 Exploring population size changes using SNP frequency spectra. *Nature*  
987 *genetics* 47: 555-559.  
988 Maeda, S., S. G. Kamita and A. Kondo, 1993 Host range expansion of *Autographa californica* nuclear  
989 polyhedrosis virus (NPV) following recombination of a 0.6-kilobase-pair DNA fragment  
990 originating from *Bombyx mori* NPV. *Journal of virology* 67: 6234-6238.  
991 Martin, M., 2011 Cutadapt removes adapter sequences from high-throughput sequencing reads. *Technical*  
992 *Notes*: 1-12.  
993 May, R. M., and M. Nowak, 1995 Coinfection and the Evolution of Parasite Virulence. *Proceedings:*  
994 *Biological Sciences* 261: 209-215.  
995 McDonald, J. H., and M. Kreitman, 1991 Adaptive protein evolution at the *Adh* locus in *Drosophila*. *Nature*  
996 351: 652-654.  
997 McKenna, A., M. Hanna, E. Banks, A. Sivachenko, K. Cibulskis *et al.*, 2010 The Genome Analysis Toolkit:  
998 A MapReduce framework for analyzing next-generation DNA sequencing data. *Proceedings of the*  
999 *International Conference on Intellectual Capital, Knowledge Management & Organizational*  
1000 *Learning* 20: 1297-1303.  
1001 Merklings, S. H., and R. P. van Rij, 2013 Beyond RNAi: Antiviral defense strategies in *Drosophila* and  
1002 mosquito. *Journal of Insect Physiology* 59: 159-170.  
1003 Mukherjee, K., H. Campos and B. Kolaczowski, 2013 Evolution of animal and plant dicers: early parallel  
1004 duplications and recurrent adaptation of antiviral RNA binding in plants. *Mol Biol Evol* 30: 627-  
1005 641.  
1006 Nielsen, R., 2005 Molecular signatures of natural selection. *Annu Rev Genet* 39: 197-218.  
1007 Nielsen, R., C. Bustamante, A. G. Clark, S. Glanowski, T. B. Sackton *et al.*, 2005 A scan for positively  
1008 selected genes in the genomes of humans and chimpanzees. *PLoS Biol* 3: e170.  
1009 Obbard, D. J., K. H. J. Gordon, A. H. Buck and F. M. Jiggins, 2009a The evolution of RNAi as a defence  
1010 against viruses and transposable elements. *Philosophical transactions of the Royal Society of*  
1011 *London. Series B, Biological sciences* 364: 99-115.



- 1012 Obbard, D. J., F. M. Jiggins, D. L. Halligan and T. J. Little, 2006 Natural Selection Drives Extremely Rapid  
1013 Evolution in Antiviral RNAi Genes. *Current biology* 16: 580-585.
- 1014 Obbard, D. J., J. J. Welch, K. W. Kim and F. M. Jiggins, 2009b Quantifying adaptive evolution in the  
1015 *Drosophila* immune system. *PLoS Genetics* 5: e1000698.
- 1016 Orr, H. A., 1995 Population genetics of speciation: the evolution of hybrid incompatibilities. *Genetics* 139:  
1017 1805-1813.
- 1018 Orr, H. A., 2004 Dobzhansky, Bateson, and the genetics of speciation. *Genetics* 168: 1097-1104.
- 1019 Orr, H. A., and M. Turelli, 2001 The evolution of postzygotic isolation: accumulating Dobzhansky-Muller  
1020 incompatibilities. *Evolution; international journal of organic evolution* 55: 1085-1094.
- 1021 Palmer, W. H., J. D. Hadfield and D. J. Obbard, 2018a RNA Interference Pathways Display High Rates of  
1022 Adaptive Protein Evolution in Multiple Invertebrates. *Genetics: genetics.300567.302017*.
- 1023 Palmer, W. H., J. Joosten, G. J. Overheul, P. W. Jansen, M. Vermeulen *et al.*, 2019 Induction and  
1024 suppression of NF- $\kappa$ B signalling by a DNA virus of *Drosophila*. *Journal of Virology* 93: e01443-  
1025 01418.
- 1026 Palmer, W. H., N. Medd, P. M. Beard and D. J. Obbard, 2018b Isolation of a natural DNA virus of  
1027 *Drosophila melanogaster*, and characterisation of host resistance and immune responses. *PLoS*  
1028 *Pathogens* 14: 1-26.
- 1029 Paradis, E., J. Claude and K. Strimmer, 2004 APE: analyses of phylogenetics and evolution in R language.  
1030 *Bioinformatics* 20: 289-290.
- 1031 Pennings, P. S., 2012 Standing genetic variation and the evolution of drug resistance in HIV. *PLoS*  
1032 *Computational Biology* 8.
- 1033 Pennings, P. S., S. Kryazhimskiy and J. Wakeley, 2014 Loss and Recovery of Genetic Diversity in Adapting  
1034 Populations of HIV. *PLoS Genetics* 10.
- 1035 Purcell, S., B. Neale, K. Todd-Brown, L. Thomas, M. A. R. Ferreira *et al.*, 2007 PLINK: A Tool Set for  
1036 Whole-Genome Association and Population-Based Linkage Analyses. *The American Journal of*  
1037 *Human Genetics* 81: 559-575.
- 1038 Quast, C., E. Pruesse, P. Yilmaz, J. Gerken, T. Schweer *et al.*, 2013 The SILVA ribosomal RNA gene  
1039 database project: improved data processing and web-based tools. *Nucleic Acids Res* 41: D590-596.
- 1040 Robinson, M. D., D. J. McCarthy and G. K. Smyth, 2009 edgeR: A Bioconductor package for differential  
1041 expression analysis of digital gene expression data. *Bioinformatics* 26: 139-140.
- 1042 Rohrmann, G. F., 2013 *Baculovirus Molecular Biology*. 211.
- 1043 Sackton, T. B., B. P. Lazzaro, T. A. Schlenke, J. D. Evans, D. Hultmark *et al.*, 2007 Dynamic evolution of  
1044 the innate immune system in *Drosophila*. *Nature Genetics* 39: 1461-1468.
- 1045 Sagulenko, P., V. Puller and R. A. Neher, 2018 TreeTime: Maximum-likelihood phylodynamic analysis.  
1046 *Virus Evol* 4: vex042.
- 1047 Schulz, M. H., D. R. Zerbino, M. Vingron and E. Birney, 2012 Oases: Robust de novo RNA-seq assembly  
1048 across the dynamic range of expression levels. *Bioinformatics* 28: 1086-1092.
- 1049 Shultz, A., and T. B. Sackton, 2019 Immune genes are hotspots of shared positive selection across birds  
1050 and mammals. *eLife* 8: e41815.
- 1051 Smit, A. F. A., and R. Hubley, 2008 RepeatModeler Open-1.0.
- 1052 Smit, A. F. A., and R. Hubley, 2013-2015 RepeatMasker Open-4.0, pp. RepeatMasker.
- 1053 Soetaert, K., T. Petzoldt and R. W. Setzer, 2010 Solving Differential Equations in R: Package deSolve.  
1054 *Journal of Statistical Software* 33: 1-24.
- 1055 Stoletzki, N., and A. Eyre-Walker, 2011 Estimation of the neutrality index. *Molecular Biology and*  
1056 *Evolution* 28: 63-70.
- 1057 Team, R. C., 2013 R: A Language and Environment for Statistical Computing, pp. R Foundation for  
1058 Statistical Computing, Vienna, Austria.
- 1059 Unckless, R. L., 2011 A DNA Virus of *Drosophila*. *PLoS ONE* 6: e26564.
- 1060 Wang, X.-H. X.-H., R. Aliyari, W.-X. Li, H.-W. Li, K. Kim *et al.*, 2006 RNA interference directs innate  
1061 immunity against viruses in adult *Drosophila*. *Science* 312: 452-454.



- 1062 Wang, Y., and J. a. Jehle, 2009 Nudiviruses and other large, double-stranded circular DNA viruses of  
1063 invertebrates: new insights on an old topic. *Journal of invertebrate pathology* 101: 187-193.
- 1064 Wang, Y., R. G. Kleespies, M. B. Ramle and J. A. Jehle, 2008 Sequencing of the large dsDNA genome of  
1065 *Oryctes rhinoceros* nudivirus using multiple displacement amplification of nanogram amounts of  
1066 virus DNA. *Journal of Virological Methods* 152: 106-108.
- 1067 Webster, C. L., F. M. Waldron, S. Robertson, D. Crowson, G. Ferrari *et al.*, 2015 The discovery,  
1068 distribution, and evolution of viruses associated with *Drosophila melanogaster*. *PLoS biology* 13:  
1069 e1002210.
- 1070 West, C., and N. Silverman, 2018 p38b and JAK-STAT signaling protect against invertebrate iridescent  
1071 virus 6 infection in *Drosophila*. *Plant Pathology*: 1-22.
- 1072 Williams, G. C., and R. M. Nesse, 1991 The Dawn of Darwinian Medicine. *The Quarterly Review of*  
1073 *Biology* 66: 1-22.
- 1074 Wilm, A., P. Poh, K. Aw, D. Bertrand, G. Hui *et al.*, 2012 LoFreq: a sequence-quality aware, ultra-sensitive  
1075 variant caller for uncovering cell-population heterogeneity from high-throughput sequencing  
1076 datasets. *Nucleic Acids Research* 40: 11189-11201.
- 1077 Wilson, B. A., N. R. Garud, A. F. Feder, Z. J. Assaf and P. S. Pennings, 2016 The population genetics of  
1078 drug resistance evolution in natural populations of viral, bacterial and eukaryotic pathogens. *Mol*  
1079 *Ecol* 25: 42-66.
- 1080 Wu, T. D., and S. Nacu, 2010 Fast and SNP-tolerant detection of complex variants and splicing in short  
1081 reads. *Bioinformatics (Oxford, England)* 26: 873-881.
- 1082 Zambon, R. A., M. Nandakumar, V. N. Vakharia and L. P. Wu, 2005 The Toll pathway is important for an  
1083 antiviral response in *Drosophila*. *Proceedings of the National Academy of Sciences* 102: 7257-  
1084 7262.
- 1085
